1 **Small RNA Mcr11 regulates genes involved in the central metabolism of**  
2 ***Mycobacterium tuberculosis* and requires 3' sequence along with the**  
3 **transcription factor AbmR for stable expression**

4

5

6 Roxie C. Girardin<sup>1</sup> and Kathleen A. McDonough<sup>1,2\*</sup>

7 <sup>1</sup>Department of Biomedical Sciences, School of Public Health, University at

8 Albany, PO Box 22002, Albany, NY 12201-2002

9 <sup>2</sup>Wadsworth Center, New York State Department of Health

10

11 \*To whom correspondence should be sent:

12 Kathleen A. McDonough, PhD

13 Wadsworth Center

14 120 New Scotland Avenue

15 PO Box 22002, Albany, NY 12201-2002

16 Phone: (518) 486-4253

17 Fax: (518) 402-4773

18 Email: [kathleen.mcdonough@health.ny.gov](mailto:kathleen.mcdonough@health.ny.gov)

19

20 **Running Title: Expression and function of mycobacterial small RNA Mcr11**

21

22 **Keywords: sRNA targets, RNA termination, RNA stability, gene regulation,**

23 **lipoylation**

25 **Abstract**

26 *Mycobacterium tuberculosis* (Mtb), the etiologic agent of tuberculosis,  
27 must adapt to host-associated environments during infection by modulating gene  
28 expression. Small regulatory RNAs (sRNAs) are key regulators of bacterial gene  
29 expression, but their roles in Mtb are not well understood. Here, we address the  
30 expression and function of the Mtb sRNA Mcr11, which is associated with slow  
31 bacterial growth and latent infections in mice. We found, by using biochemical  
32 and genetic approaches, that the AbmR transcription factor and an extended  
33 region of native sequence 3' to the *mcr11* gene enhance production of mature  
34 Mcr11. Additionally, we found that expression of Mcr11 was unstable in the  
35 saprophyte *Mycobacterium smegmatis*, which lacks an *mcr11* orthologue.  
36 Bioinformatic analyses used to predict regulatory targets of Mcr11 identified 9-11  
37 nucleotide regions immediately upstream of Rv3282 and *lipB* with potential for  
38 direct base-pairing with Mcr11. *mcr11*-dependent regulation of Rv3282, *lipB*,  
39 Rv2216 and *pknA* was demonstrated using qRT-PCR in wild type versus *mcr11*-  
40 deleted Mtb and found to be responsive to the presence of fatty acids. These  
41 studies establish that Mcr11 has roles in regulating growth and central  
42 metabolism in Mtb that warrant further investigation. In addition, our finding that  
43 multiple factors are required for production of stable, mature Mcr11 emphasizes  
44 the need to study mechanisms of sRNA expression and stability in TB complex  
45 mycobacteria to understand their roles in TB pathogenesis.

46

47

## 48 **Author Summary**

49 Bacterial pathogens must continuously modulate their gene expression in  
50 response to changing conditions to successfully infect and survive within their  
51 hosts. Transcription factors are well known regulators of gene expression, but  
52 there is growing recognition that small RNAs (sRNAs) also have critically  
53 important roles in bacterial gene regulation. Many sRNAs have been identified in  
54 *M. tuberculosis* (Mtb), but little is known about their expression, regulatory targets  
55 or roles in Mtb biology. In this study, we found that the Mtb sRNA Mcr11, which  
56 is expressed at high levels in slowly replicating Mtb and during mouse infection,  
57 regulates expression of several target genes involved in central metabolism.  
58 Importantly, we also discovered that *mcr11* has unexpected requirements for  
59 stable expression in mycobacteria. In particular, we identified RNA sequence  
60 elements immediately downstream of *mcr11* that enhance transcription  
61 termination and production of mature Mcr11 RNA in TB-complex mycobacteria.  
62 Meanwhile, ectopic expression of Mcr11 was unstable in a non-pathogenic strain  
63 of mycobacteria, suggesting that factors specific to pathogenic mycobacteria are  
64 required for the stable production of Mcr11. These studies identify sRNA stability  
65 as a new frontier for understanding gene expression in Mtb.

## 67 **Introduction**

68 Tuberculosis (TB) remains a major threat to global public health, with at  
69 least 10 million new, incident cases and 1.3 million deaths due to TB in 2017 (1).  
70 The basic biology of *Mycobacterium tuberculosis* (Mtb), the etiological agent of  
71 TB, is poorly understood despite its importance to the development of new  
72 therapeutic interventions. Mtb can adopt a specialized physiological state within  
73 host tissues, which renders the bacteria phenotypically drug resistant and viable  
74 despite extended periods of slow or non-replicating persistence (NRP) (2). NRP  
75 and phenotypic drug resistance pose particular challenges for intervention,  
76 making it critical to understand the regulatory processes that enable Mtb to adapt  
77 to host conditions.

78 Bacterial and host factors that contribute to NRP and slow growth are still  
79 being defined (3). Host-associated environmental cues that result in metabolic  
80 remodeling and a shift away from active growth toward a state of persistence  
81 include hypoxia, nitrosative stress, redox stress, nutrient starvation, as well as  
82 adaptation to cholesterol and fatty acid metabolism (4-9). Isocitrate lysases  
83 (ICLs) are used by bacteria to maintain growth on fatty acids through the  
84 glyoxylate shunt, and are critical for Mtb's ability to survive on fatty acids and  
85 within the host (10-12). Surprisingly, ICLs are also required for growth on  
86 carbohydrate carbon sources (13), and gluconeogenesis is required for Mtb  
87 virulence (14-16). Additionally, lipoylated enzymes involved in the citric acid  
88 cycle, such as lipoamide dehydrogenase (Lpd) and dihydrolipoamide  
89 acyltransferase (DlaT), are necessary for Mtb survival in the host and viability

90 during NRP ([17-19](#)). However, factors that regulate these processes are not well  
91 understood.

92 Gene expression studies have provided critical insights into the regulation  
93 and function of proteins like transcription factors that modulate gene expression  
94 as Mtb adapts to the host environment during infection ([20](#), [21](#)). The additional  
95 role of sRNAs in gene regulation is recognized in other bacteria ([22](#)), and several  
96 sRNAs whose expression is responsive to stress and/ or growth phase have  
97 been identified in mycobacteria ([23-28](#)). ([23-26](#), [29-31](#)). It also has been  
98 observed that over expression of some sRNAs leads to slow or delayed growth in  
99 mycobacteria ([23](#), [32](#)). However, the importance of these differentially expressed  
100 sRNAs to the adaptation and survival of Mtb during periods of stress has not  
101 been fully addressed.

102 The intergenic sRNA Mcr11 (*ncRv11264Ac*) is one of the best-studied  
103 mycobacterial sRNAs ([24](#), [26](#), [29](#), [33](#)). Expression of Mcr11 is regulated in  
104 response to advanced growth phase and levels of the universal second  
105 messenger 3',5'-cyclic adenosine monophosphate (cAMP) ([24](#), [26](#), [29](#)).  
106 Additionally, Mcr11 is abundantly expressed by Mtb in the lungs of chronically  
107 infected mice ([26](#)) as well as in hypoxic and non-replicating Mtb ([32](#)).  
108 Transcriptional regulators of *mcr11* expression include the product of the  
109 adjacent, divergently expressed gene *abmR* (*Rv1265*) ([33](#)), and the cAMP  
110 binding transcription factor (TF) CRP<sub>MT</sub> ([29](#)). The structure and function of Mcr11  
111 in TB-complex mycobacteria is unknown, prompting us to further characterize  
112 this sRNA.

113           Here, we report that cis-acting, extended, native sequence 3' to Mcr11  
114 enhances production of Mcr11 in mycobacteria. Optimal Mcr11 termination  
115 efficiency needed the transcription factor AbmR and was regulated by growth  
116 phase in Mtb and *Mycobacterium bovis* BCG, but not in the fast-growing  
117 saprophyte *Mycobacterium smegmatis*. We found that *mcr11* regulates  
118 expression of *lipB* and *Rv3282*, which contribute to central metabolic pathways  
119 associated with NRP and slow growth in Mtb. In addition, Mcr11 affected growth  
120 of both Mtb and BCG in hypoxic conditions without fatty acids. This study  
121 identifies TB complex-specific cis and trans factors required for stable Mcr11  
122 expression while providing the first report of *mcr11*-dependent regulation of gene  
123 targets in Mtb.

124

125

## 127 **Results**

### 128 ***Modeling secondary structure of Mcr11***

129 Previous studies established two 5' ends of Mcr11 at chromosomal  
130 positions 1413224 and 1413227 in *Mycobacterium tuberculosis* H37Rv ([24](#), [29](#)),  
131 but the 3' end of Mcr11 is poorly defined. Preliminary efforts to express Mcr11  
132 based on size estimates from prior Northern blot experiments were not  
133 successful, despite the well-mapped 5' end of the sRNA. Secondary structural  
134 features of sRNAs greatly contribute to their function, and RNA folding is most  
135 strongly influenced by the nucleotide sequence of the RNA ([34](#), [35](#)). We  
136 reasoned that defining the precise boundaries of Mcr11 could help in identifying  
137 its function.

138 We mapped the 3' end of Mcr11 to chromosomal positions 1413107 and  
139 1413108 in *Mycobacterium tuberculosis* (Mtb) using 3' rapid amplification of  
140 cNDA ends (RACE) and Sanger sequencing (Figure 1A). These 3' ends are 120  
141 and 119 nucleotides (nt) downstream from the most abundant previously mapped  
142 5' end at position 1413227 ([24](#)). Our mapped 3' ends vary 3-4 nucleotides from  
143 the 3' end at chromosomal position 1413111 inferred by deep sequencing ([36](#)),  
144 and are 13-14 nt shorter than the 3' end estimated by cloning ([24](#)) (Figure 1A).  
145 These results indicate that Mcr11 is a transcript between 117 and 121 nt long,  
146 which is consistent with its observed size by Northern blot ([24](#), [26](#), [29](#)).

147 The mapped 3' ends of Mcr11 at chromosomal positions 1413107/  
148 1413108 varied by 3-13 nt from previous estimates of the 3' end of Mcr11, so we  
149 considered the possibility that this variance could be functionally significant.

150 Transcriptional termination occurs in prokaryotes by two described mechanisms:  
151 Rho-dependent termination and intrinsic, Rho-independent termination ([37-39](#)).  
152 Rho-dependent termination requires the association of the ATP-hydrolyzing  
153 molecular motor Rho with the nascent RNA, which is typically cytosine-enriched,  
154 guanosine-depleted and unstructured at the 3' end ([40](#)). Intrinsic, Rho-  
155 independent termination is governed by the formation of a structured termination  
156 hairpin that is usually followed a poly-U tail, and is highly dependent upon the  
157 sequence of the nascent RNA. Several mycobacterial sRNAs have multiple  
158 reported 3' ends, suggestive of Rho-dependent termination and/or post-  
159 transcriptional processing ([23](#), [30](#), [31](#)). However, relatively little is known about  
160 transcriptional termination in Mtb, particularly at sRNAs ([41-45](#)).

161 We modeled the secondary structure of Mcr11 with varying lengths of  
162 extended, native 3' RNA sequence by using RNA Structure ([46](#)) to reveal  
163 potential functional features. Mcr11 was predicted to be highly structured, with  
164 few single-stranded (ss) regions available for potential base-pairing with  
165 regulatory target RNA sequences (Figure 1B). Use of either mapped 5' end of  
166 *mcr11* produced the same Mcr11 secondary structure, as these 5' nucleotides  
167 are predicted to be unpaired (Figure 1B). Modeled structures of extended native  
168 sequence 3' to our mapped ends of *mcr11* revealed additional highly structured  
169 motifs with similarity to predicted Rho-independent terminators (RITs)  
170 downstream of *mcr11* in mycobacteria ([43](#), [44](#)). However, none included the  
171 long, characteristic poly-U tail found in RITs of other bacteria ([38](#)). A 10 nt region  
172 containing a sub-optimal poly-U tract was identified by scanning sequence



173 downstream of the mapped 3' end of *Mcr11* in the constructs that contained 3'  
174 sequence elements (TSEs) 2-4 (Figure 1A). Modeling the secondary structure of  
175 this sequence revealed a stem loop structure with a 7nt trail containing 4  
176 discontinuous Us (Figure 1C).

177

### 178 ***Measurement of TSE function in Msm***

179 We tested the impact of different *mcr11* TSEs on the transcriptional  
180 termination of *Mcr11* using promoter:*mcr11*:TSE:*GFPv* reporter constructs  
181 (Figure 2A-B). We reasoned that transcriptional termination levels could be  
182 inferred by using *GFPv* fluorescence as a relative measure of transcriptional  
183 read-through beyond the *mcr11* gene (Figure 2A). The relative percentage of  
184 termination for each TSE was calculated by dividing the observed fluorescence  
185 of each *Pmcr11*:TSE:*GFPv* strain by the observed fluorescence of an *mcr11*  
186 promoter-only:*GFPv* construct (*Pmcr11*:*GFPv*), subtracting the product from 1,  
187 and multiplying the result by 100. Promoterless *GFPv* served as a negative  
188 assay control, and an *mcr11*-independent promoter:*GFPv* fusion construct  
189 served as a positive assay control. A positive intrinsic termination control was  
190 generated by fusing *mcr11* and a small amount of native 3' trailing sequence to a  
191 synthetic RIT (tt<sub>sbi</sub>B) that has been shown to function at ~98% efficiency with *Mtb*  
192 RNAP *in vitro* (Figure 1B) (42).

193 Our initial termination experiments measuring TSE efficiency were  
194 performed in *Msm*, because it lacks an *mcr11* orthologue and thus has no basal  
195 *Mcr11* expression. The inclusion of any TSE sequence at the 3' end of *mcr11*

196 resulted in decreased transcriptional read-through of the *mcr11*:GFPv fusion  
197 reporter, as compared to the relative levels of GFPv fluorescence for *Pmcr11*  
198 alone (Figure 2B). This result suggested that all TSEs supported transcriptional  
199 termination to varying degrees. Longer TSEs had greater termination efficiency,  
200 but the positive *tt<sub>sbi</sub>B* intrinsic termination control exhibited the strongest mean  
201 termination efficiency at 88% (Figure 2C). Paraformaldehyde-fixed duplicates of  
202 each sample were subjected to flow cytometry analysis to determine if the mean  
203 GFPv fluorescence observed in our plate-based assay was reflective of the  
204 fluorescence observed in individual cells, or if there were populations of cells with  
205 varying levels of fluorescence. A single, homogenous population of fluorescent  
206 cells was observed for each reporter, demonstrating that mean fluorescence  
207 measured in the plate reader assay was representative of the fluorescence in  
208 individual cells (Supplemental Figure 2). From these data, we concluded that  
209 mean fluorescence reflected relative termination efficiency for each TSE reporter.

210 Northern blot analysis was performed to further evaluate the expression of  
211 *Mcr11* in *Msm*. We noted that the size of *Mcr11* did not vary in *Msm* despite the  
212 presence of TSEs with various lengths, suggesting that TSEs are rapidly  
213 processed off of the mature sRNA if they are transcribed (Figure 2D). *Mcr11* was  
214 also present at very low levels in *Msm* when compared to a BCG control for  
215 which 1/3 the amount of total RNA present in the *Msm* samples was loaded in  
216 the gel (Figure 2D). These results are consistent with the possibility of reduced  
217 *Mcr11* expression and/or stability in *Msm* compared to BCG.

218

219 ***TB complex- specific factors are required for stable Mcr11 expression***

220 *mcr11* expression varies across growth phases in TB complex  
221 mycobacteria (24, 33), so we examined the effect of growth phase on *mcr11*  
222 expression in Msm. Fluorescence from the GFPv transcriptional reporters was  
223 measured at mid-log and late stationary phase. Surprisingly, we observed that  
224 *Pmcr11* activity was not increased by advancing growth phase when expressed  
225 in Msm (Figure 2E), suggesting that a positive regulatory factor was absent.

226 Previously, we showed that the divergently expressed DNA-binding  
227 protein AbmR is a growth phase-responsive activator of *mcr11* expression (33).  
228 Although the Msm orthologue (*MSMEG\_5010*) of *abmR* displays both high amino  
229 acid sequence identity (68.75%) and amino acid similarity (83.51%) to AbmR  
230 (33), we hypothesized that *abmR* has functionality that the Msm orthologue  
231 lacks. Thus, we added a copy of the Mtb *abmR* locus upstream of the  
232 *Pmcr11::GFPv* fusion sequences and tested the activity of *Pmcr11* in response to  
233 growth phase in Msm. The addition of *abmR* significantly increased *Pmcr11*  
234 activity in Msm, and rendered *Pmcr11* activity responsive to growth phase  
235 (Figure 2E), as previously observed in BCG and Mtb (33). However, inclusion of  
236 *abmR* did not significantly increase the amount of stable Mcr11 detected by  
237 Northern blot in Msm (Figure 2D), indicating that Mcr11 is unstable when  
238 transcribed in Msm. Together, these results show that Mtb *abmR* regulates  
239 *mcr11* expression at the transcriptional level, but is not sufficient for stable Mcr11  
240 expression in a non-native environment.

241 Further studies in TB-complex mycobacteria showed that the termination  
242 efficiencies of *mcr11* TSEs in mid-log phase BCG were similar to those observed  
243 in Msm (Figure 3), but only BCG showed enhanced *mcr11* TSE termination  
244 efficiencies in late stationary phase. This growth-phase dependent increase in  
245 termination efficiency in BCG was strongest for TSE1, which improved from  
246 approximately 40% to 70% (Figure 3C). Overall termination efficiencies of *mcr11*  
247 TSEs were also greater in virulent Mtb (H37Rv) than in BCG or Msm (Figure 3D-  
248 F). Deletion of *abmR* caused a small but significant decrease in *mcr11*  
249 termination efficiencies from all constructs, with the TSE1 short hairpin being the  
250 most strongly affected (Supplemental Figure 3). Together, these data indicate  
251 that multiple trans-acting factors specific to the genetic background of TB-  
252 complex mycobacteria facilitate the transcriptional termination and production of  
253 stable Mcr11.

254

### 255 ***Longer TSEs enhance expression of Mcr11 in TB-complex mycobacteria***

256 We expected that increased termination efficiencies would correlate with  
257 higher levels of mature Mcr11 in TB complex mycobacteria. Thus, we used  
258 Northern blot analyses to measure the production of stable Mcr11 from various  
259 *mcr11* TSE constructs in  $\Delta mcr11$  strains of BCG and Mtb during late stationary  
260 phase (Figure 4). Robust levels of Mcr11 were produced from constructs  
261 containing native *mcr11* TSEs. As was observed in experiments with Msm,  
262 Mcr11 size remained constant despite its expression with TSEs of different

263 lengths in BCG or Mtb (Figure 4). This size restriction is consistent with precise  
264 termination or an RNA processing event that produces discrete 3' ends.

265 We considered the possibility that expression of *mcr11* in the context of an  
266 mRNA with a translated, stable transgene such as *GFPv* could contribute to the  
267 stability of Mcr11. Production of Mcr11 from *mcr11:TSE1* constructs was  
268 compared to Mcr11 levels from a similar construct in which *GPFv* is not  
269 immediately downstream of TSE1 (Figure 5A). Mcr11 levels were not affected by  
270 the GFPv location (Figure 5B), indicating that *GFPv* did not contribute to the  
271 production or processing of stable Mcr11 in these experiments. This conclusion  
272 is also consistent with the low levels of Mcr11 observed in Msm despite the  
273 presence of the *GFPv* transgene (Figure 2D).

274 As advancing growth phase significantly improved the termination  
275 efficiencies of TSEs in BCG (Figure 3C), we tested the effects of growth phase  
276 on the expression of *mcr11*. Mcr11 levels were observed by Northern blot (Figure  
277 5C) and measured by qRT-PCR (Figure 5D) in BCG $\Delta$ *mcr11* strains carrying  
278 ectopic copies of either *mcr11:TSE1* or *mcr11:TSE3*. Both constructs showed  
279 growth-phase dependent increases in expression of stable Mcr11 (Figure 5C and  
280 5D). Stress conditions can modulate the efficiency of RITs (47) and induce the  
281 appearance of multiple, different size products of a single sRNA in Mtb (23, 27).  
282 However, neither BCG nor Mtb displayed significant stress-induced changes in  
283 the termination efficiencies of *mcr11* TSEs (Supplemental Table 3) when  
284 subjected to nitrosative stress (DETA-NO), ATP depletion (BDQ), DNA damage

285 (OFX), or transcriptional stress (RIF). These data demonstrate the significant role  
286 that differences in native 3' sequence have on stable Mcr11 expression.

287

### 288 ***Identification of Mcr11 regulatory targets***

289 Having identified the sequence features required for robust ectopic  
290 production of Mcr11 in complemented  $\Delta mcr11$  strains, we considered *mcr11*  
291 function. A bioinformatic search of potential regulatory targets of Mcr11 using  
292 TargetRNA (48) and TargetRNA2 (49) identified *abmR* as the top-scoring hit  
293 (Figure 6A) (Supplemental Table 4). We measured the relative abundance of  
294 AbmR protein by Western blot analysis, and found that it was decreased in  
295 BGC $\Delta mcr11$  and Mtb $\Delta mcr11$  (Figure 6B,C). However, recent reports indicate  
296 that the *abmR* mRNA is a leaderless transcript that lacks a 5' UTR (50), so the  
297 region of direct base-pair complementarity with the Mcr11 sRNA and the 5' end  
298 of *abmR* predicted by TargetRNA is not likely to be present in the *abmR* mRNA  
299 (50). We also previously showed that the *mcr11* gene overlaps a substantial  
300 portion of the DNA sequences identified as the upstream enhancer and promoter  
301 regions for *abmR* transcription (Figure 6A) (33, 51).

302 We addressed the possibility that *mcr11* deletion has cis rather than trans  
303 effects on *abmR* expression due to disruption of *abmR* regulatory sequences.  
304 Promoter:*lacZ* reporter studies were used to compare *PabmR* activity in the  
305 presence and absence of flanking *mcr11* sequences in Wt BCG and Mtb  
306 backgrounds that express Wt levels of Mcr11. Transcriptional activity from the  
307 minimal *abmR* promoter lacking adjacent sequence in the *mcr11* gene was much

308 lower than that from the extended *abmR* promoter that includes contiguous  
309 *mcr11* gene sequences (Figure 6D). These assays were conducted in the Wt  
310 backgrounds of BCG and Mtb with comparable levels of native *mcr11* expression  
311 in all matched strains, indicating that sequence overlapping the *mcr11* gene was  
312 required in cis for full *abmR* promoter activity. We conclude that the reduced  
313 expression of *abmR* in  $\Delta mcr11$  strains is likely due to the loss of sequence-based  
314 *abmR* regulatory elements within the *mcr11* gene rather than a trans-acting  
315 regulatory effect of Mcr11 on *abmR* expression.

316 TargetRNA also predicted multiple putative targets of Mcr11 regulation,  
317 including two genes within operons involved in central metabolic processes and  
318 cell division: *lipB* (encodes lipoate protein ligase B, needed for lipoate  
319 biosynthesis) (Figure 7A) and *Rv3282* (encodes a conserved hypothetical protein  
320 with homology to Maf septum-site inhibition protein) (Figure 7B). The intergenic  
321 spacing between putative target gene *fadA3* (*Rv1074c*), which encodes a beta-  
322 ketoacyl coenzyme A thiolase, and the preceding gene (*Rv1075c*) is identical to  
323 that of the intergenic spacing between *Rv2216* and *lipB*. However, *fadA3* is likely  
324 to be transcribed independently of *Rv1075c* (50). *lipB* and *Rv3282* were selected  
325 for follow-up because they are essential, associated with growth and central  
326 metabolism of Mtb, and contain predicted Mcr11 base-pairing sequences that are  
327 within known mRNA transcript boundaries. Each of these target transcripts has  
328 the potential to interact with Mcr11 through a 9-11 nt continuous base pairing  
329 region, followed by a shorter stretch of gapped or imperfect base pairing (Figure  
330 7A and 7B). A region from nt 39-55 of Mcr11 was predicted to interact with these

331 mRNA targets and others (Figure 7C and 7D, Supplemental Table 4), which  
332 includes a region of Mcr11 predicted to be in an unpaired loop in multiple  
333 modeled secondary structures of Mcr11 (Supplemental Figure 4).

334

### 335 ***Fatty acids affect Mcr11-dependent regulation of target genes in Mtb***

336 The *lipB* operon includes *dlaT*, which encodes DlaT, the E2 component of  
337 pyruvate dehydrogenase (PDH) and the peroxynitrite reductase/peroxidase  
338 (PNR/P) complex in Mtb. The function of DlaT is modulated by lipoylation, which  
339 is dependent upon lipoate biosynthesis by LipB ([18](#), [52](#)). BkdC (also called PdhC  
340 or Rv2495c) is a component of the branched chain keto-acid dehydrogenase  
341 (BCKADH) complex in Mtb that also requires lipoylation for activity. Disruption of  
342 components in any of these complexes can cause growth defects in Mtb, some  
343 of which are dependent upon the nutrient mixture present in the growth media  
344 ([18](#), [19](#)). The genes upstream of Rv3282 are *accD5* and *accE5*, which are  
345 needed for a long chain acetyl-CoA carboxylase enzymatic complex that  
346 generates substrates for fatty acid and mycolic acid biosynthesis ([53](#), [54](#)).

347 We used qRT-PCR to measure expression of genes within the operons  
348 containing predicted Mcr11-regulatory targets *lipB* and Rv3282 in Wt versus  
349  $\Delta mcr11$  strains. Gene expression was queried in stationary phase BCG and Mtb  
350 grown in media with (+OA) or without (-OA) fatty acids to assess the impact of  
351 Mcr11 regulatory function in these conditions. Tween-80® is a hydrolysable  
352 detergent that can release a substantial amount of fatty acids (primarily oleic  
353 acid), and so was replaced with the non-hydrolysable detergent Tyloxapol in  
354 media lacking fatty acids. The *mcr11* complements included TSE4 with or without



355 an intact copy of *abmR*. Levels of *phoP*, a response regulator expected to be  
356 independent of *mcr11* and *abmR*, and *pknA*, a serine-threonine protein kinase  
357 required for growth, were also measured.

358 Expression of *Rv3282*, *Rv2216*, *lipB* and *pknA* was significantly de-  
359 repressed in *Mtb* $\Delta$ *mcr11* compared to Wt *Mtb* in the absence, but not the  
360 presence, of fatty acids. In contrast, levels of *lipB* and *pknA* expression  
361 decreased in the *mcr11* *Mtb* mutant when fatty acids were present.  
362 Complementation of *mcr11* fully (*Rv3282*, *pknA*) or partially (*Rv2216*, *lipB*)  
363 restored expression to Wt levels (Figure 8A). The expression of *accD5* (*Rv3280*)  
364 was significantly de-repressed and *accE5* (*Rv3281*) trended toward de-  
365 repression in *Mtb* $\Delta$ *mcr11*, and complementation partially restored Wt levels of  
366 expression of both genes (Supplemental Figure 5A). Expression of *dlaT* and  
367 *phoP* were not altered in *Mtb* (Figure 8A). From these data, we concluded that  
368 Mcr11-mediated regulation expression of *Rv3282*, *Rv2216*, *lipB* and *pknA*  
369 expression in stationary phase *Mtb* is affected by the levels of fatty acids in the  
370 media. In contrast, no Mcr11-dependent regulation of the putative target genes  
371 was observed in BCG other than a trend of higher *Rv3282* expression in  
372 BCG $\Delta$ *mcr11* relative to Wt BCG (Figure 8C and 8D). These data demonstrate  
373 that *mcr11*-dependent regulation of specific target genes is responsive to the  
374 fatty acid content of the culture media, and suggest that Mcr11 has a role in  
375 regulating the central metabolism of *Mtb*.

376 Expression levels of mRNA do not always match expression levels of the  
377 cognate protein if a gene is subjected to multiple layers of regulation. We tested if

378 the protein levels of PknA or lipoylated DiaT were altered in *Mtb* $\Delta$ *mcr11* by  
379 Western blot. No significant differences in the abundance of PknA or lipoylated  
380 DiaT were observed between *Mtb* $\Delta$ *mcr11* and Wt *Mtb* (Supplemental Figure 5B).  
381 It is possible that de-repression of *lipB* does not affect DiaT lipoylation if lipoate is  
382 limiting or if wild-type levels are already saturating for lipoylation of DiaT.

383

### 384 ***Mcr11 is required for optimal growth of BCG and Mtb without fatty acids***

385 Optimal growth of *Mtb* on carbohydrate-based carbon sources requires  
386 appropriate *dlaT* expression ([18](#), [19](#)) and *lipB*, *accD5*, and *accE5* are essential  
387 for the growth of *Mtb* ([55](#), [56](#)). Mutations in *Rv3282* delay *Mtb* growth, even in  
388 nutrient rich media ([55](#)). Based on our observed regulation of these genes by  
389 *Mcr11*, we hypothesized that  $\Delta$ *mcr11* deleted strains would exhibit a growth  
390 defect when forced to utilize carbohydrate carbon sources for growth in media  
391 lacking a source of fatty acids.

392 No growth differences were observed between Wt and  $\Delta$ *mcr11* mutant  
393 *Mtb* or BCG in media containing fatty acids. However, BCG $\Delta$ *mcr11* was severely  
394 growth-lagged and *Mtb* $\Delta$ *mcr11* was moderately growth delayed compared to Wt  
395 bacteria when grown in media lacking fatty acids (Figure 8E-H).  
396 Complementation with *mcr11* partially complemented growth in BCG and fully  
397 restored growth to Wt levels in *Mtb* (Figure 8G and 8E). From these data, we  
398 conclude that *mcr11* has a role in the central metabolism and growth of BCG and  
399 *Mtb*.

400

## 402 Discussion

403 This work identifies several genes associated with central metabolism in  
404 Mtb as regulatory targets of the sRNA Mcr11. We also demonstrated that  
405 transcriptional termination and stable production of the sRNA Mcr11 is enhanced  
406 by extended native sequence 3' to *mcr11* along with the product of the  
407 divergently transcribed adjacent gene, *abmR*. The regulation of central  
408 metabolism in Mtb is consistent with *mcr11* expression profiles in response to  
409 growth phase and *in vivo* infection ([26](#), [33](#)). However, the additional  
410 requirements for TB complex specific factors for stable Mcr11 expression were  
411 unexpected, and this may have broader implications for understanding sRNA  
412 expression in Mtb.

413 Characterization of the factors required for efficient termination and stable  
414 expression of Mcr11 was a prerequisite for the complementation studies that  
415 confirmed Mcr11 regulatory targets. Protein coding mRNAs often can tolerate  
416 variable amounts of 5' and 3' flanking sequence because the signals for protein  
417 expression are provided immediately upstream and within the open reading  
418 frame (ORF). In contrast, expression of functional sRNAs may be more  
419 dependent on RNA chaperones and/or processing factors, as well as cis-acting  
420 sequence elements at their transcriptional boundaries that may be difficult to  
421 define ([25](#), [47](#), [57-59](#)). Defining the role of these cis-acting sequences for *mcr11*  
422 and possibly other sRNAs in Mtb is an important topic for future studies.

423

424

## 425 **Mechanism of *mcr11* transcriptional termination**

426 Sequences at the 3' end of sRNAs can be critical for stability, function and  
427 interaction with RNA chaperones, although such chaperones have yet to be  
428 identified in mycobacteria (25, 59-64). The role of extended native 3' sequences  
429 for expression of mycobacterial sRNAs warrants further investigation to  
430 determine whether *mcr11* is exceptional or representative of a larger group of  
431 sRNAs with regards to expression and stability requirements.

432 A recent study of Rho function in Mtb (41) found that depletion of Rho did  
433 not impact transcriptional boundaries at predicted RITs (43, 44), demonstrating a  
434 clear separation in the populations of transcripts terminated by RITs and Rho-  
435 dependent mechanisms. While we found that TSEs promote expression of  
436 Mcr11, their underlying mechanism remains unclear and our data do not  
437 precisely fit either the current RIT or Rho-dependent termination models (Table  
438 1). We propose a model in which *mcr11* processing occurs immediately  
439 following, or concurrent with, Rho-dependent termination.

440 Table 1: Comparison of transcription termination types

| Features                                            | Rho-<br>Dependent | Intrinsic | Mcr11 |
|-----------------------------------------------------|-------------------|-----------|-------|
| Predicted hairpin in<br>3' sequence                 |                   | ✓         | ✓     |
| Unstructured, C-rich<br>3' sequence                 | ✓                 |           |       |
| Poly U-tract in 3'<br>sequence                      |                   | ✓         |       |
| Extrinsic factor(s)<br>required                     | ✓                 |           | ✓     |
| Transcription factor<br>may impact<br>functionality | ✓                 | ✓         | ✓     |

441  
442

443 Rho-independent termination is considered “intrinsic” because extrinsic  
444 accessory factors are not required for function (38). Our results clearly indicate  
445 that production of stable Mcr11 requires factors other than the TSEs (Figs. 2D  
446 and 4). The species-specific effects we observed for *mcr11* termination  
447 measured by the GFPv reporter assays suggest that bacterial-specific factors  
448 affect the efficiency of *mcr11* termination itself, although the effects on Mcr11  
449 stability are more striking (Figs. 2-4).

450 Rho utilization (*rut*) sites are degenerate and difficult to predict using  
451 bioinformatics approaches, but transcripts terminated by Rho tend to have C-  
452 enriched, G-depleted 3' ends that are thought to be unstructured (40). It is not  
453 clear if there is a *rut* site within *mcr11*, as the sequences downstream of the 3'  
454 end of Mcr11 are predicted to be highly structured and are rich in both G and C  
455 (Fig. 1). A run of 6Cs (nucleotides 93-98) occurs within Mcr11, but this region  
456 may be highly structured (Fig. 1). In contrast, Mcr11 TSEs 2-4, which contributed  
457 strongly to the termination of Mcr11, all possess C-rich loops in their predicted  
458 secondary structures that could be *rut* sites (Fig. 1). Rho-significant regions  
459 (RSRs) reported in the Botella et al study (41) include an RSR that begins 6 nt  
460 downstream of the mapped 3' end of Mcr11, that is characterized as a region of  
461 general antisense transcription. The presence of this RSR is consistent with the  
462 possibility that *mcr11* expression is Rho-terminated. Mcr10 (*ncRv1157a*) is also  
463 proximal to an RSR (41). Future work is needed to establish the importance of  
464 Rho-dependent termination for mycobacterial sRNAs.

465 In *Escherichia coli*, multiple trans-acting factors are known to modulate  
466 termination and anti-termination of Rho-terminated sRNAs (65). AbmR, an ATP-  
467 responsive DNA-binding transcription factor that activates *mcr11* expression (33),  
468 was found here to also positively regulate termination efficiency of *mcr11*.  
469 Despite the high similarity between *abmR* and its Msm orthologue (33),  
470 *MSM\_5010* failed to strongly activate *mcr11* expression and Mcr11 transcripts  
471 were unstable in Msm, even when *abmR* was provided in trans. It is possible that  
472 AbmR interacts directly with RNAP or Rho to affect termination, or recruits an as  
473 yet undefined trans-acting factor that modulates Mcr11 termination in Mtb. It will  
474 also be important to determine which specific sequence or structural elements in  
475 the TSEs of *mcr11* contribute to transcriptional termination versus processing,  
476 and the extent to which similar TSEs are associated with other sRNAs in  
477 mycobacteria.

478 The discrete 3' end of mature Mcr11 observed by Northern blot is  
479 consistent with a processed or precisely terminated RNA, as transcription  
480 through TSEs would otherwise result in RNAs significantly longer products.  
481 Processing of the 3' ends of mycobacterial sRNAs has been proposed (31), and  
482 a recent report identified a hypoxia-regulated mycobacterial sRNA that is  
483 extensively processed at its 3' end (25). The observed size variants of specific  
484 sRNA species in response to host-associated stress conditions (23) provide  
485 further evidence for processing of sRNAs in mycobacteria.

486 Processing mechanisms for tRNAs and sRNAs have been defined,  
487 particularly for transcripts terminated by RITs in *E. coli* (57, 66-70). Recent work

488 has demonstrated that Rho terminated transcripts have processed 3' ends  
489 immediately downstream of a stable stem-loop (71). The processing of these  
490 discrete ends is dependent on the redundant action of the 3' → 5' exonucleases  
491 PNPase and RNase II, and it was speculated that the stem-loop promotes  
492 stabilization of the processed transcript (71). While few RNA processing  
493 enzymes of mycobacteria have been well characterized, the Mtb genome  
494 encodes many known RNases with varying sequence specificities (72-77). We  
495 speculate that unidentified TB-complex RNA chaperones and/or modifying  
496 enzymes contribute to Mcr11 stability, and that their absence in Msm results in  
497 Mcr11 degradation.

498

#### 499 ***Regulation of predicted targets of Mcr11***

500 Oleic acid is the main fatty acid present in rich mycobacterial media  
501 formulations, provided either directly as oleic acid or in the hydrolyzable, nonionic  
502 detergent Tween-80®. The presence of Tween-80® can alter acid resistance  
503 (78), enhances the growth of mycobacteria when combined with glucose or  
504 glycerol (79, 80), and increases the uptake of glucose by BCG (79, 80). While we  
505 did not observe sensitivity to acid in BCGΔ*mcr11* or BCGΔ*abmR* (data not  
506 shown), *mcr11* was required for growth on media lacking added fatty acids.  
507 Nutrient rich media is often used in batch culture experimentation with Mtb, and  
508 the potential confounding effect of multiple nutrient sources on characterizing the  
509 essentiality and function of gene products has recently gained appreciation (36,  
510 81). Future studies characterizing nutrient uptake in Mtb and BCG strains of

511 *Δmcr11* or *ΔabmR* will further our understanding of the nutrient related growth  
512 defects of these strains.

513 Two metabolic enzymes critical for Mtb pathogenesis are known to be  
514 lipoylated in Mtb, including dihydrolipoamide acyltransferase (DlaT) and BkdC, a  
515 component of the Lpd-dependent branched chain keto-acid dehydrogenase  
516 (BCKADH) (18). Lipoylation in Mtb is presumed to depend solely on lipoate  
517 synthesis by the enzymes LipA and the Mcr11 target LipB, as scavenging and  
518 import pathways are apparently lacking (52). *Rv3282* has homology to Maf, a  
519 septum inhibition protein conserved across all domains of life (82, 83). It is in a  
520 putative operon with *accD5* and *accE5*, which encode a probable propionyl-  
521 coenzyme A carboxylase involved in the detoxification of propionate using the  
522 methylmalonyl pathway to produce methyl-branched virulence lipids (84). Despite  
523 *mcr11*-dependent regulation of *Rv3282* in the absence of fatty acids, *MtbΔmcr11*  
524 did not have a filamentous cell morphology (data not shown) and the function of  
525 *Rv3282* in Mtb has not been defined. The regulation of Mcr11's targets was  
526 responsive to the fatty acid content of the growth media, and it will be important  
527 to determine if the observed growth defects of *MtbΔmcr11* are due to the  
528 dysregulation of *lipB* and *Rv3282*, or if there are additional targets of Mcr11  
529 regulation that account for this phenotype (Figure 9). Additionally, the role of  
530 Mcr11 in supporting the growth and persistence of Mtb in response to nutrient  
531 availability and growth arrest should be explored.

532 Mcr11-dependent regulation of *lipB* and *Rv3282* expression is expected to  
533 occur through base-pairing with the mRNA, although future work is needed to



534 establish the mechanism (Figure 7). The sRNA RyhB is known to differentially  
535 regulate expression of individual genes within the *iscRSUA* operon, resulting in  
536 down-regulation of the *icsSUA* genes while maintaining expression of *iscR* (85).  
537 This mechanism requires an intra-cistronic base-pairing dependent translational  
538 blockade of *iscS*, followed by recruitment of RNaseE and selective degradation  
539 of the 3' end of the mRNA. The position of both putative Mcr11 base-pairing sites  
540 within target gene operons raises multiple possibilities for *mcr11*-mediated  
541 regulation of co-transcribed genes that will be an intriguing topic for future study.  
542 We noted that the *mcr11* target interaction site within the intergenic region of  
543 *Rv2216* and *lipB* had identical spacing to that of *Rv1075c* and *fadA3*, although  
544 the significance of this architecture is unknown.

545 This study shows that the transcriptional termination and stability of the  
546 sRNA Mcr11 is enhanced by extended, native 3' sequence elements (TSEs) in  
547 TB complex mycobacteria. The role of AbmR in *mcr11* expression was extended  
548 from that of a transcriptional activator to include enhancement of *mcr11*  
549 transcriptional termination. Our observation that bacterial-species specific factors  
550 govern sRNA stability in mycobacteria may also extend to other sRNAs.  
551 Combined use of bioinformatic and molecular tools established fatty acid  
552 responsive, *mcr11*-dependent gene regulation in Mtb and provides a versatile  
553 strategy for the continued search of sRNA function in pathogenic mycobacteria.  
554 Future work defining the precise roles of the sRNA Mcr11 in regulating the  
555 growth and metabolism of Mtb will greatly advance our understanding of this  
556 important pathogen.

## 558 **Materials and Methods**

### 559 ***Bacterial Strains and Growth Conditions***

560 *Mycobacterium tuberculosis* H37Rv (Mtb) (ATCC 25618) and  
561 *Mycobacterium bovis* BCG (BCG) (Pasteur strain, Trudeau Institute) were grown  
562 on 7H10 agar (Difco) supplemented with 10% oleic acid-albumin-dextrose-  
563 catalase (OADC) (Becton Dickson and Company) and 0.01% cyclohexamide or  
564 in Middlebrook 7H9 liquid medium (Difco) supplemented with 10% (vol/vol)  
565 OADC, 0.2% (vol/vol) glycerol, and 0.05% (vol/vol) Tween-80 (Sigma-Aldrich) in  
566 physiologically relevant shaking, hypoxic conditions (1.3% O<sub>2</sub>, 5% CO<sub>2</sub>) (86) for  
567 promoter::reporter fusion assays and Northern blot analysis. *Mycobacterium*  
568 *smegmatis* mc<sup>2</sup>155 (Msm) (ATCC 700048) was grown in Middlebrook 7H9 liquid  
569 medium (Difco) supplemented with 10% (vol/vol) OADC, 0.2% (vol/vol) glycerol,  
570 and 0.05% (vol/vol) Tween-80 (Sigma-Aldrich), shaking in ambient air for  
571 promoter::reporter fusion assays and Northern blot analysis. All experiments  
572 were started from low-passage frozen stocks. For cloning experiments,  
573 *Escherichia coli* strains were grown on Luria-Bertani (Difco) agar plates or in  
574 liquid broth. Growth media and plates were supplemented with 50 µg/mL  
575 hygromycin, 25 µg/mL kanamycin (Sigma-Aldrich) for selection of clones. All  
576 bacterial cultures were incubated at 37°C.

### 577 ***Mutant Strain Construction***

578 Knockout strains of *mcr11* in Mtb and BCG genetic backgrounds were  
579 generated using homologous recombination (87) to replace nucleotides 1-100  
580 with a hygromycin resistance cassette. Disruption of *mcr11* was confirmed with

581 polymerase chain reaction (PCR) (Supplemental Figure 1B. and 1C.) and  
582 Northern blot analysis (Supplemental Figure 1D. and 1E.). Several  
583 complementation constructs were created to restore Mcr11 expression.  
584 Sequence from the corrected *abmR* (*Rv1265*) start site ([51](#)) to the end of the  
585 *Rv1264* ORF was amplified by PCR and cloned downstream of the *efTu*  
586 (*Rv0685*) promoter in the multi-copy plasmid pMBC280, creating pMBC1211.  
587 PCR was used to amplify varying lengths of sequence from the end of the  
588 *Rv1264* ORF through the end of the *abmR* ORF, and they were cloned it into  
589 pMBC409, which contains a kanamycin resistance marker, to create pMBC2040,  
590 pMBC2041, and pMBC2042 (Supplemental Figure 1A.). Complementation  
591 plasmids were sequenced to verify that the desired sequences had been  
592 correctly incorporated and then used to transform Mtb and BCG by  
593 electroporation. A complete list of plasmids used in this study are provided in  
594 Supplemental Table 1 and primers are listed in Supplemental Table 2.

### 595 ***Mapping the 3' End of Mcr11***

596 RNA was harvested from late-log phase Mtb and the 3' end of Mcr11 was  
597 mapped using the miScript Reverse Transcription Kit (Qiagen) ([88](#)) and a gene-  
598 specific primer. The reaction product was cloned into pCRII-TOPO vector (Life  
599 Technologies) and ten positive clones were subjected to Sanger sequencing.  
600 The sequences were mapped back to the chromosome of Mtb.

### 601 ***Bioinformatic Modeling of Mcr11***

602 Secondary structure modeling of Mcr11 and putative native intrinsic  
603 terminators was performed using RNAstructure using default parameters ([46](#)).

604 Color-coded base-pair drawings of predicted RNA secondary structures were  
605 created with Visualization Applet for RNA (VARNA) (89) and simplified line  
606 drawings were made in Inkscape (inkscape.org). A synthetic terminator ( $tt_{sbiB}$ )  
607 (90) was modeled onto Mcr11 as well. Secondary structure modeling of Mcr11  
608 was performed using RNAstructure (46). Using the previously published 5' and 3'  
609 boundaries of Mcr11, minimum free energy (MFE) and centroid structures for  
610 Mcr11 derived from CentroidFold (using the CONTRAfold inference engine),  
611 Mfold, NUPACK, RNAfold, and RNAstructure algorithms were created (46, 91-  
612 94). Base-pair drawings of predicted RNA secondary structures were either  
613 directly exported from the software used, or created with Visualization Applet for  
614 RNA (VARNA) (89) and simplified line drawings were made in Inkscape  
615 (inkscape.org).

616 Regulatory targets of Mcr11 in Mtb were predicted using TargetRNA (48)  
617 and TargetRNA2 algorithms (49), set to default parameters (Table3). Where  
618 possible, the position of predicted regions of base-pairing between Mcr11 and a  
619 putative regulatory target were evaluated against known 5' ends of mRNAs in  
620 Mtb (50) (Table 3).

### 621 **Promoter::Reporter Fusion Assays**

622 Promoter:*lacZ* fusions were created to compare the relative transcriptional  
623 activities from DNA sequences spanning the intergenic space between *Rv1264*  
624 and *abmR*, and *mcr11* and *abmR* (Supplemental Figure 2). The promoters of  
625 *gyrB* (*Rv0005*) and *efTu* (*Rv0685*) were used as positive controls, and a  
626 promoterless construct was used as a negative control. The relevant constructs

627 were transformed into wild-type (Wt) strains of BCG and Mtb and assayed for  $\beta$ -  
628 galactosidase activity in late log phase cultures grown in ambient, shaking  
629 conditions by adding 5-acetylaminofluoresceindi- $\beta$ -D-galactopyranoside (C<sub>2</sub>FDG;  
630 Molecular Probes) and measuring fluorescence in a Cytofluor 4000 fluorometer  
631 (PerSeptive Biosystems) as described previously (95).

632 Constructs including the *mcr11* promoter, Mcr11 sequence, and various  
633 potential intrinsic terminator sequences were fused to the reporter green  
634 fluorescent protein Venus (*GFPv*) on an integrating plasmid as previously  
635 described (33). A GFPv fluorescence assay was used to measure promoter  
636 activity and read-through of the putative intrinsic terminators of Mcr11 in Msm,  
637 BCG, and Mtb.

638 At mid-log phase and late stationary phase, aliquots of recombinant  
639 strains were collected and gently sonicated (setting 4, 4 pulses of 5" on time  
640 interspersed by 5' off time) using a Virsonic 475 Ultrasonic Cell Disrupter with a  
641 cup horn attachment (VirTis Company) before duplicate samples were diluted 1:1  
642 in fresh media. The level of fluorescence in arbitrary units from the GFPv reporter  
643 strain was detected using the CytoFluor Multi-Well Plate Reader Series 4000  
644 (PerSeptive Biosystems) at 485 nm excitation and 530 nm emission. The optical  
645 density (OD) at 620 nm was read using a Tecan Sunrise® microplate reader and  
646 fluorescence levels were normalized to 10<sup>6</sup> bacteria. A promotorless (-) construct  
647 was used as a negative control and the promoters *Ptuf* and *Pgyr* served as  
648 positive controls. The % termination was calculated by dividing the observed  
649 GFPv fluorescence in arbitrary units of each indicated terminator construct by the

650 amount of GFPv fluorescence in arbitrary units measured from the *mcr11*  
651 promoter.

652 Late stationary phase reporter strains of BCG and Mtb were diluted with  
653 fresh media to an OD<sub>620 nm</sub> of 1.25 in a 12 well plate, and then subjected to a  
654 variety of cellular stressors for a 24 hour period in shaking, hypoxic conditions  
655 (1.3% O<sub>2</sub>, 5% CO<sub>2</sub>). Cells were treated with 250 μM diethyltriamine-NO (DETA-  
656 NO) (Sigma-Aldrich), 1 μg per ml ofloxacin (OFX), 0.28 μg per ml rifampicin  
657 (RIF), 53 μg per ml bedaquiline (BDQ), or 0.1% dimethyl sulfoxide (DMSO)  
658 vehicle control. GFPv fluorescence in arbitrary units per 10<sup>6</sup> bacteria (by  
659 measured OD at 620 nm) was monitored as described above, and percent  
660 termination was calculated relative to *Pmcr11* controls.

### 661 ***Fluorescence-Activated Cell Sorting Analysis***

662 Fluorescence-activated cell sorting analysis was performed on Msm  
663 samples that had been fixed with 4% paraformaldehyde (PFA) in phosphate  
664 buffered saline (PBS) at pH 7.0 for 30 minutes at room temperature. Fixation was  
665 quenched pH-adjusted glycine, and cells were washed three times with PBS.  
666 Cells were diluted approximately 1:500 in DPBS and subjected to FACS analysis  
667 with a FACS Calibur (Becton Dickson) as previously described ([96](#)). Data was  
668 collected for 20,000 events per sample and analyzed in CellQuest software  
669 (Becton Dickenson).

### 670 ***RNA Isolation***

671 Total RNA was harvested from Msm, BCG and Mtb after cultures were  
672 treated 0.5 M final GTC solution (5.0 M guanadinium isothiocyanate, 25 mM

673 sodium citrate, 0.5% sarkosyl, and 0.1 M 2- $\beta$ -mercaptoethanol) and pelleted at  
674 4°C. Pelleted cells were resuspended in TRIzol Reagent (Invitrogen) and cells  
675 were disrupted with 0.1 mm zirconia-silica beads (BioSpec Products) and three  
676 70-second high-speed pulse treatments in a bead-beater (BioSpec Products).  
677 RNA was recovered from lysates with Direct-zol Mini Prep columns (Zymo) per  
678 the manufacturer's protocol. RNA was eluted from the column with nuclease free-  
679 water, treated with DNaseI (Qiagen) for 20 minutes at room temperature, and  
680 isopropanol precipitated. One  $\mu$ g of total RNA was screened for DNA  
681 contamination by PCR using primers KM1309 and KM1310 internal to the sigA  
682 ORF. The quality of each RNA sample was assessed by running 1.0  $\mu$ g of DNA-  
683 free RNA on a 0.1% (weight/vol) SDS-agarose gel and visualizing intact 23S,  
684 16S, and 5S ribosomal RNA bands after staining with ethidium bromide (Sigma-  
685 Aldrich).

#### 686 ***Northern Blots***

687 High quality DNA-free total RNA isolated from Msm, BCG, and Mtb was  
688 used for Northern blot analysis of Mcr11 expression. 3-10  $\mu$ g RNA was separated  
689 on a 10% 8 M urea PAGE run at a constant current of 20 mA for 1-1.5 h. The gel  
690 was electroblotted onto a Hybond N (Millipore) nylon membrane using a wet  
691 transfer system (Bio-Rad Laboratories) as previously described (Girardin, in  
692 prep). Blots were UV cross-linked and baked at 80°C for 2 h prior to pre-  
693 hybridization at 42°C for 1 h in Ravid-Hyb Buffer (GE Healthcare Life Sciences).  
694 Hybridization with  $\alpha$ -<sup>32</sup>P-ATP end-labeled DNA oligo probes was performed at

695 42°C for 2-16 h. Blots were washed per the manufacturer's protocol and exposed  
696 to phosphor-screens for visualization.

### 697 ***Generation of Mycobacterial Cell Lysates and Western Blotting***

698 Strains of BCG and Mtb were grown in the desired condition, and pelleted  
699 and washed twice in ice-cold Dulbecco's phosphate buffered saline, calcium and  
700 magnesium free (DPBS-CMF), with 0.2% protease inhibitor (Sigma-Aldrich). Cell  
701 pellets were resuspended in 1/25 volume lysis buffer (0.3% SDS, 200 mM DTT,  
702 28 mM Tris-Hcl, 22 mM Tris-Base, and 1% protease inhibitor cocktail) and  
703 disrupted by two rounds of high-powered sonication at 4°C with Virsonic 475  
704 Ultrasonic Cell Disrupter with a cup horn attachment (VirTis Company)  
705 interspersed with 10 freeze-thaw cycles as previously described (33). Lysate was  
706 cleared by centrifugation and the cleared lysate was heat-killed at 95°C before  
707 quantification with a NanoDrop 2000 (Thermo Scientific).

708 A total of 30 µg protein of each sample was separated by 12-15% Tris-  
709 glycine SDS-PAGE, and gels were immunoblotted on Immobilon-P membranes  
710 (Millipore) for 1h at 1 mA/cm<sup>2</sup> using a wet transfer system (Bio-Rad  
711 Laboratories). Blots were blocked and probed with 1° antibody in 5% milk  
712 (vol/vol) in 50 mM Tris-buffered saline with 0.05% (vol/vol) Tween-20 (Fisher  
713 Scientific). Monoclonal antibodies against *Mycobacterium tuberculosis* GlcB  
714 (Gene Rv1837c), Clone α-GlcB (produced *in vitro* NR-13799) was obtained  
715 through the NIH Biodefense and Emerging Infections Research Resources  
716 Repository, NIAID, NIH. Polyclonal mouse AbmR anti-serum was previously  
717 generated in-house (33). Polyclonal rabbit anti-lipoic acid antibody (EMD



718 Millipore catalogue # 437695-100ul) was obtained from Fisher Scientific. Primary  
719 antibodies were detected with peroxidase conjugated goat secondary antibody  
720 and enhanced chemiluminescence (ECL) western blotting detection reagent  
721 (Thermo Scientific).

### 722 **Growth Curve Analysis**

723 The growth of BCG and Mtb in hypoxic (1.3% O<sub>2</sub>, 5% CO<sub>2</sub>), shaking  
724 conditions were monitored by measuring the optical density at 620 nm (OD<sub>620</sub>)  
725 of gently sonicated aliquots of cells with a Tecan Sunrise® microplate reader.  
726 Cultures were grown in vented T25 tissue culture flasks (Corning), and time  
727 points were in single or multi-day intervals. Growth comparisons between  
728 Middlebrook 7H9 + 0.2% glycerol, 10% OADC, and 0.05% Tween-80 (+OA) or in  
729 Middlebrook 7H9 + 0.2% glycerol, 10% ADC, and 0.05% Tyloxapol (-OA) were  
730 made.

731

### 732 **Acknowledgements**

733 We are very grateful to Dr. Guangchun Bai and Damen Schaak for  
734 generating the *mcr11* knockout strains of BCG and Mtb used in this study. We  
735 also thank Dr. Joseph Wade for helpful discussions, and gratefully acknowledge  
736 the Wadsworth Center Applied Genomics Technologies Core for DNA  
737 sequencing and the Wadsworth Center Media and Tissue Culture Core for media  
738 preparation.

## 740 References

- 741 1. WHO. Global Tuberculosis Report 2018. Geneva: World Health  
742 Organization, 2018. 2018.
- 743 2. Gomez JE, McKinney JD. M. tuberculosis persistence, latency, and drug  
744 tolerance. *Tuberculosis*. 2004;84(1-2):29-44.
- 745 3. Bergkessel M, Basta DW, Newman DK. The physiology of growth arrest:  
746 uniting molecular and environmental microbiology. *Nat Rev Microbiol*.  
747 2016;14(9):549-62.
- 748 4. Garton NJ, Waddell SJ, Sherratt AL, Lee SM, Smith RJ, Senner C, et al.  
749 Cytological and transcript analyses reveal fat and lazy persister-like bacilli in  
750 tuberculous sputum. *PLoS medicine*. 2008;5(4):e75.
- 751 5. Honaker RW, Dhiman RK, Narayanasamy P, Crick DC, Voskuil MI. DosS  
752 responds to a reduced electron transport system to induce the *Mycobacterium*  
753 *tuberculosis* DosR regulon. *J Bacteriol*. 2010;192(24):6447-55.
- 754 6. Iona E, Pardini M, Mustazzolu A, Piccaro G, Nisini R, Fattorini L, et al.  
755 *Mycobacterium tuberculosis* gene expression at different stages of hypoxia-  
756 induced dormancy and upon resuscitation. *Journal of microbiology (Seoul,*  
757 *Korea)*. 2016;54(8):565-72.
- 758 7. Schubert OT, Ludwig C, Kogadeeva M, Zimmermann M, Rosenberger G,  
759 Gengenbacher M, et al. Absolute Proteome Composition and Dynamics during  
760 Dormancy and Resuscitation of *Mycobacterium tuberculosis*. *Cell Host Microbe*.  
761 2015;18(1):96-108.
- 762 8. Betts JC, Lukey PT, Robb LC, McAdam RA, Duncan K. Evaluation of a  
763 nutrient starvation model of *Mycobacterium tuberculosis* persistence by gene and  
764 protein expression profiling. *Molecular Microbiology*. 2002;43(3):717-31.
- 765 9. Shi L, Sohaskey CD, Kana BD, Dawes S, North RJ, Mizrahi V, et al.  
766 Changes in energy metabolism of *Mycobacterium tuberculosis* in mouse lung  
767 and under in vitro conditions affecting aerobic respiration. *Proc Natl Acad Sci U S*  
768 *A*. 2005;102(43):15629-34.
- 769 10. Eoh H, Rhee KY. Methylcitrate cycle defines the bactericidal essentiality of  
770 isocitrate lyase for survival of *Mycobacterium tuberculosis* on fatty acids. *Proc*  
771 *Natl Acad Sci U S A*. 2014;111(13):4976-81.
- 772 11. McKinney JD, Honer zu Bentrup K, Munoz-Elias EJ, Miczak A, Chen B,  
773 Chan WT, et al. Persistence of *Mycobacterium tuberculosis* in macrophages and  
774 mice requires the glyoxylate shunt enzyme isocitrate lyase. *Nature*.  
775 2000;406(6797):735-8.
- 776 12. Munoz-Elias EJ, McKinney JD. *Mycobacterium tuberculosis* isocitrate  
777 lyases 1 and 2 are jointly required for in vivo growth and virulence. *Nature*  
778 *medicine*. 2005;11(6):638-44.
- 779 13. Beste DJ, Bonde B, Hawkins N, Ward JL, Beale MH, Noack S, et al.  
780 (1)(3)C metabolic flux analysis identifies an unusual route for pyruvate  
781 dissimilation in mycobacteria which requires isocitrate lyase and carbon dioxide  
782 fixation. *PLoS Pathog*. 2011;7(7):e1002091.
- 783 14. Ganapathy U, Marrero J, Calhoun S, Eoh H, de Carvalho LP, Rhee K, et  
784 al. Two enzymes with redundant fructose biphosphatase activity sustain

- 785 gluconeogenesis and virulence in *Mycobacterium tuberculosis*. *Nat Commun*.  
786 2015;6:7912.
- 787 15. Gutka HJ, Wang Y, Franzblau SG, Movahedzadeh F. *glpx* Gene in  
788 *Mycobacterium tuberculosis* Is Required for In Vitro Gluconeogenic Growth and  
789 In Vivo Survival. *PLoS One*. 2015;10(9):e0138436.
- 790 16. Marrero J, Rhee KY, Schnappinger D, Pethe K, Ehrt S. Gluconeogenic  
791 carbon flow of tricarboxylic acid cycle intermediates is critical for *Mycobacterium*  
792 *tuberculosis* to establish and maintain infection. *Proc Natl Acad Sci U S A*.  
793 2010;107(21):9819-24.
- 794 17. Bryk R, Gold B, Venugopal A, Singh J, Samy R, Pupek K, et al. Selective  
795 killing of nonreplicating mycobacteria. *Cell Host Microbe*. 2008;3(3):137-45.
- 796 18. Venugopal A, Bryk R, Shi S, Rhee K, Rath P, Schnappinger D, et al.  
797 Virulence of *Mycobacterium tuberculosis* depends on lipoamide dehydrogenase,  
798 a member of three multienzyme complexes. *Cell Host Microbe*. 2011;9(1):21-31.
- 799 19. Shi S, Ehrt S. Dihydrolipoamide acyltransferase is critical for  
800 *Mycobacterium tuberculosis* pathogenesis. *Infect Immun*. 2006;74(1):56-63.
- 801 20. Mvubu NE, Pillay B, Gamielien J, Bishai W, Pillay M. Canonical  
802 pathways, networks and transcriptional factor regulation by clinical strains of  
803 *Mycobacterium tuberculosis* in pulmonary alveolar epithelial cells. *Tuberculosis*  
804 (Edinb). 2016;97:73-85.
- 805 21. Schnappinger D, Ehrt S, Voskuil MI, Liu Y, Mangan JA, Monahan IM, et al.  
806 Transcriptional Adaptation of *Mycobacterium tuberculosis* within Macrophages:  
807 Insights into the Phagosomal Environment. *J Exp Med*. 2003;198(5):693-704.
- 808 22. Waters LS, Storz G. Regulatory RNAs in bacteria. *Cell*. 2009;136(4):615-  
809 28.
- 810 23. Arnvig KB, Young DB. Identification of small RNAs in *Mycobacterium*  
811 *tuberculosis*. *Mol Microbiol*. 2009;73(3):397-408.
- 812 24. DiChiara JM, Contreras-Martinez LM, Livny J, Smith D, McDonough KA,  
813 Belfort M. Multiple small RNAs identified in *Mycobacterium bovis* BCG are also  
814 expressed in *Mycobacterium tuberculosis* and *Mycobacterium smegmatis*.  
815 *Nucleic Acids Res*. 2010;38(12):4067-78.
- 816 25. Moores A, Riesco AB, Schwenk S, Arnvig KB. Expression, maturation and  
817 turnover of *DrrS*, an unusually stable, *DosR* regulated small RNA in  
818 *Mycobacterium tuberculosis*. *PLoS One*. 2017;12(3):e0174079.
- 819 26. Pelly S, Bishai WR, Lamichhane G. A screen for non-coding RNA in  
820 *Mycobacterium tuberculosis* reveals a cAMP-responsive RNA that is expressed  
821 during infection. *Gene*. 2012;500(1):85-92.
- 822 27. Namouchi A, Gomez-Munoz M, Frye SA, Moen LV, Rognes T, Tonjum T,  
823 et al. The *Mycobacterium tuberculosis* transcriptional landscape under genotoxic  
824 stress. *BMC Genomics*. 2016;17(1):791.
- 825 28. Gerrick ER, Barbier T, Chase MR, Xu R, Francois J, Lin VH, et al. Small  
826 RNA profiling in *Mycobacterium tuberculosis* identifies *MrsI* as necessary for an  
827 anticipatory iron sparing response. *Proc Natl Acad Sci U S A*.  
828 2018;115(25):6464-9.
- 829 29. Arnvig KB, Comas I, Thomson NR, Houghton J, Boshoff HI, Croucher NJ,  
830 et al. Sequence-based analysis uncovers an abundance of non-coding RNA in

- 831 the total transcriptome of *Mycobacterium tuberculosis*. *PLoS Pathog.*  
832 2011;7(11):e1002342.
- 833 30. Miotto P, Forti F, Ambrosi A, Pellin D, Veiga DF, Balazsi G, et al.  
834 Genome-wide discovery of small RNAs in *Mycobacterium tuberculosis*. *PLoS*  
835 *One.* 2012;7(12):e51950.
- 836 31. Tsai CH, Baranowski C, Livny J, McDonough KA, Wade JT, Contreras  
837 LM. Identification of novel sRNAs in mycobacterial species. *PLoS One.*  
838 2013;8(11):e79411.
- 839 32. Ignatov DV, Salina EG, Fursov MV, Skvortsov TA, Azhikina TL,  
840 Kaprelyants AS. Dormant non-culturable *Mycobacterium tuberculosis* retains  
841 stable low-abundant mRNA. *BMC Genomics.* 2015;16:954.
- 842 33. Girardin RC, Bai G, He J, Sui H, McDonough KA. AbmR (Rv1265) is a  
843 Novel Transcription Factor of *Mycobacterium tuberculosis* That Regulates Host  
844 Cell Association and Expression of the Non-coding Small RNA Mcr11. *Mol*  
845 *Microbiol.* 2018.
- 846 34. Dubey AK, Baker CS, Romeo T, Babitzke P. RNA sequence and  
847 secondary structure participate in high-affinity CsrA-RNA interaction. *RNA.*  
848 2005;11(10):1579-87.
- 849 35. Hnilicova J, Jirat Matejckova J, Sikova M, Pospisil J, Halada P, Panek J,  
850 et al. Ms1, a novel sRNA interacting with the RNA polymerase core in  
851 mycobacteria. *Nucleic Acids Res.* 2014;42(18):11763-76.
- 852 36. DeJesus MA, Gerrick ER, Xu W, Park SW, Long JE, Boutte CC, et al.  
853 Comprehensive Essentiality Analysis of the *Mycobacterium tuberculosis* Genome  
854 via Saturating Transposon Mutagenesis. *MBio.* 2017;8(1).
- 855 37. Mooney RA, Landick R. Building a better stop sign: understanding the  
856 signals that terminate transcription. *Nat Methods.* 2013;10(7):618-9.
- 857 38. Ray-Soni A, Bellecourt MJ, Landick R. Mechanisms of Bacterial  
858 Transcription Termination: All Good Things Must End. *Annu Rev Biochem.*  
859 2016;85:319-47.
- 860 39. Santangelo TJ, Artsimovitch I. Termination and antitermination: RNA  
861 polymerase runs a stop sign. *Nat Rev Microbiol.* 2011;9(5):319-29.
- 862 40. Peters JM, Mooney RA, Kuan PF, Rowland JL, Keles S, Landick R. Rho  
863 directs widespread termination of intragenic and stable RNA transcription. *Proc*  
864 *Natl Acad Sci U S A.* 2009;106(36):15406-11.
- 865 41. Botella L, Vaubourgeix J, Livny J, Schnappinger D. Depleting  
866 *Mycobacterium tuberculosis* of the transcription termination factor Rho causes  
867 pervasive transcription and rapid death. *Nat Commun.* 2017;8:14731.
- 868 42. Czyz A, Mooney RA, Iaconi A, Landick R. Mycobacterial RNA polymerase  
869 requires a U-tract at intrinsic terminators and is aided by NusG at suboptimal  
870 terminators. *MBio.* 2014;5(2):e00931.
- 871 43. Gardner PP, Barquist L, Bateman A, Nawrocki EP, Weinberg Z. RNIE:  
872 genome-wide prediction of bacterial intrinsic terminators. *Nucleic Acids Res.*  
873 2011;39(14):5845-52.
- 874 44. Mitra A, Angamuthu K, Nagaraja V. Genome-wide analysis of the intrinsic  
875 terminators of transcription across the genus *Mycobacterium*. *Tuberculosis*  
876 (Edinb). 2008;88(6):566-75.

- 877 45. Arnvig KB, Pennell S, Gopal B, Colston MJ. A high-affinity interaction  
878 between NusA and the *rrn* nut site in *Mycobacterium tuberculosis*. *Proc Natl*  
879 *Acad Sci U S A*. 2004;101(22):8325-30.
- 880 46. Mathews DH. RNA Secondary Structure Analysis Using RNAstructure.  
881 *Current Protocols in Bioinformatics*: John Wiley & Sons, Inc.; 2002.
- 882 47. Morita T, Ueda M, Kubo K, Aiba H. Insights into transcription termination  
883 of Hfq-binding sRNAs of *Escherichia coli* and characterization of readthrough  
884 products. *RNA*. 2015;21(8):1490-501.
- 885 48. Tjaden B. TargetRNA: a tool for predicting targets of small RNA action in  
886 bacteria. *Nucleic Acids Res*. 2008;36(Web Server issue):W109-13.
- 887 49. Kery MB, Feldman M, Livny J, Tjaden B. TargetRNA2: identifying targets  
888 of small regulatory RNAs in bacteria. *Nucleic Acids Res*. 2014;42(Web Server  
889 issue):W124-9.
- 890 50. Cortes T, Schubert OT, Rose G, Arnvig KB, Comas I, Aebersold R, et al.  
891 Genome-wide mapping of transcriptional start sites defines an extensive  
892 leaderless transcriptome in *Mycobacterium tuberculosis*. *Cell Rep*.  
893 2013;5(4):1121-31.
- 894 51. Gazdik MA, Bai G, Wu Y, McDonough KA. Rv1675c (*cmr*) regulates  
895 intramacrophage and cyclic AMP-induced gene expression in *Mycobacterium*  
896 *tuberculosis*-complex mycobacteria. *Mol Microbiol*. 2009;71(2):434-48.
- 897 52. Spalding MD, Prigge ST. Lipoic acid metabolism in microbial pathogens.  
898 *Microbiol Mol Biol Rev*. 2010;74(2):200-28.
- 899 53. Bazet Lyonnet B, Diacovich L, Cabruja M, Bardou F, Quemard A, Gago G,  
900 et al. Pleiotropic effect of AccD5 and AccE5 depletion in acyl-coenzyme A  
901 carboxylase activity and in lipid biosynthesis in mycobacteria. *PLoS One*.  
902 2014;9(6):e99853.
- 903 54. Bazet Lyonnet B, Diacovich L, Gago G, Spina L, Bardou F, Lemassu A, et  
904 al. Functional reconstitution of the *Mycobacterium tuberculosis* long-chain acyl-  
905 CoA carboxylase from multiple acyl-CoA subunits. *FEBS J*. 2017;284(7):1110-  
906 25.
- 907 55. Sassetti CM, Boyd DH, Rubin EJ. Genes required for mycobacterial  
908 growth defined by high density mutagenesis. *Molecular Microbiology*.  
909 2003;48(1):77-84.
- 910 56. Sassetti CM, Rubin EJ. Genetic requirements for mycobacterial survival  
911 during infection. *Proc Natl Acad Sci U S A*. 2003;100(22):12989-94.
- 912 57. Chae H, Han K, Kim KS, Park H, Lee J, Lee Y. Rho-dependent  
913 termination of *ssrS* (6S RNA) transcription in *Escherichia coli*: implication for 3'  
914 processing of 6S RNA and expression of downstream *ygfA* (putative 5-formyl-  
915 tetrahydrofolate cyclo-ligase). *J Biol Chem*. 2011;286(1):114-22.
- 916 58. Kriner MA, Sevostyanova A, Groisman EA. Learning from the Leaders:  
917 Gene Regulation by the Transcription Termination Factor Rho. *Trends in*  
918 *biochemical sciences*. 2016;41(8):690-9.
- 919 59. Patrick R, Shiflett KJT-M, Ryszard Michalczyk, Louis A. "Pete" Silks, and  
920 Goutam Gupta. Structural Studies on the Hairpins at the 3' Untranslated Region  
921 of an Anthrax Toxin Gene. *Biochemistry* 2003;42(20):6078-89.

- 922 60. Ishikawa H, Otaka H, Maki K, Morita T, Aiba H. The functional Hfq-binding  
923 module of bacterial sRNAs consists of a double or single hairpin preceded by a  
924 U-rich sequence and followed by a 3' poly(U) tail. *RNA*. 2012;18(5):1062-74.
- 925 61. Johnson CM, Chen Y, Lee H, Ke A, Weaver KE, Dunny GM. Identification  
926 of a conserved branched RNA structure that functions as a factor-independent  
927 terminator. *Proc Natl Acad Sci U S A*. 2014;111(9):3573-8.
- 928 62. Regnier P, Hajnsdorf E. The interplay of Hfq, poly(A) polymerase I and  
929 exoribonucleases at the 3' ends of RNAs resulting from Rho-independent  
930 termination: A tentative model. *RNA Biol*. 2013;10(4):602-9.
- 931 63. Sauer E, Weichenrieder O. Structural basis for RNA 3'-end recognition by  
932 Hfq. *Proc Natl Acad Sci U S A*. 2011;108(32):13065-70.
- 933 64. Olejniczak M, Storz G. ProQ/FinO-domain proteins: another ubiquitous  
934 family of RNA matchmakers? *Mol Microbiol*. 2017;104(6):905-15.
- 935 65. Rabhi M, Espeli O, Schwartz A, Cayrol B, Rahmouni AR, Arluison V, et al.  
936 The Sm-like RNA chaperone Hfq mediates transcription antitermination at Rho-  
937 dependent terminators. *EMBO J*. 2011;30(14):2805-16.
- 938 66. Agrawal A, Mohanty BK, Kushner SR. Processing of the seven valine  
939 tRNAs in *Escherichia coli* involves novel features of RNase P. *Nucleic Acids Res*.  
940 2014;42(17):11166-79.
- 941 67. Chao Y, Li L, Girodat D, Forstner KU, Said N, Corcoran C, et al. In Vivo  
942 Cleavage Map Illuminates the Central Role of RNase E in Coding and Non-  
943 coding RNA Pathways. *Mol Cell*. 2017;65(1):39-51.
- 944 68. Gopel Y, Khan MA, Gorke B. Domain swapping between homologous  
945 bacterial small RNAs dissects processing and Hfq binding determinants and  
946 uncovers an aptamer for conditional RNase E cleavage. *Nucleic Acids Res*.  
947 2016;44(2):824-37.
- 948 69. Mohanty BK, Kushner SR. Processing of the *Escherichia coli* leuX tRNA  
949 transcript, encoding tRNA(Leu5), requires either the 3'→5' exoribonuclease  
950 polynucleotide phosphorylase or RNase P to remove the Rho-independent  
951 transcription terminator. *Nucleic Acids Res*. 2010;38(2):597-607.
- 952 70. Mohanty BK, Petree JR, Kushner SR. Endonucleolytic cleavages by  
953 RNase E generate the mature 3' termini of the three proline tRNAs in *Escherichia*  
954 *coli*. *Nucleic Acids Res*. 2016;44(13):6350-62.
- 955 71. Dar D, Sorek R. High-resolution RNA 3'-ends mapping of bacterial Rho-  
956 dependent transcripts. *Nucleic Acids Res*. 2018;46(13):6797-805.
- 957 72. Abendroth J, Ollodart A, Andrews ES, Myler PJ, Staker BL, Edwards TE,  
958 et al. *Mycobacterium tuberculosis* Rv2179c protein establishes a new  
959 exoribonuclease family with broad phylogenetic distribution. *J Biol Chem*.  
960 2014;289(4):2139-47.
- 961 73. Taverniti V, Forti F, Ghisotti D, Putzer H. *Mycobacterium smegmatis*  
962 RNase J is a 5'-3' exo-/endoribonuclease and both RNase J and RNase E are  
963 involved in ribosomal RNA maturation. *Mol Microbiol*. 2011;82(5):1260-76.
- 964 74. Uson ML, Ordonez H, Shuman S. *Mycobacterium smegmatis* HelyY Is an  
965 RNA-Activated ATPase/dATPase and 3'-to-5' Helicase That Unwinds 3'-Tailed  
966 RNA Duplexes and RNA:DNA Hybrids. *J Bacteriol*. 2015;197(19):3057-65.

- 967 75. Zeller ME, Csanadi A, Miczak A, Rose T, Bizebard T, Kaberdin VR.  
968 Quaternary structure and biochemical properties of mycobacterial RNase E/G.  
969 The Biochemical journal. 2007;403(1):207-15.
- 970 76. Zhu L, Phadtare S, Nariya H, Ouyang M, Husson RN, Inouye M. The  
971 mRNA interferases, MazF-mt3 and MazF-mt7 from Mycobacterium tuberculosis  
972 target unique pentad sequences in single-stranded RNA. Mol Microbiol.  
973 2008;69(3):559-69.
- 974 77. Zhu L, Zhang Y, Teh JS, Zhang J, Connell N, Rubin H, et al.  
975 Characterization of mRNA interferases from Mycobacterium tuberculosis. J Biol  
976 Chem. 2006;281(27):18638-43.
- 977 78. Vandal OH, Pierini LM, Schnappinger D, Nathan CF, Ehrt S. A membrane  
978 protein preserves intrabacterial pH in intraphagosomal Mycobacterium  
979 tuberculosis. Nature medicine. 2008;14(8):849-54.
- 980 79. Lofthouse EK, Wheeler PR, Beste DJ, Khatri BL, Wu H, Mendum TA, et  
981 al. Systems-based approaches to probing metabolic variation within the  
982 Mycobacterium tuberculosis complex. PLoS One. 2013;8(9):e75913.
- 983 80. Schaefer WB, Lewis CW, Jr. Effect of oleic acid on growth and cell  
984 structure of mycobacteria. J Bacteriol. 1965;90(5):1438-47.
- 985 81. Griffin JE, Gawronski JD, Dejesus MA, Ioerger TR, Akerley BJ, Sassetti  
986 CM. High-resolution phenotypic profiling defines genes essential for  
987 mycobacterial growth and cholesterol catabolism. PLoS Pathog.  
988 2011;7(9):e1002251.
- 989 82. Hamoen LW. Cell division blockage: but this time by a surprisingly  
990 conserved protein. Mol Microbiol. 2011;81(1):1-3.
- 991 83. Tchigvintsev A, Tchigvintsev D, Flick R, Popovic A, Dong A, Xu X, et al.  
992 Biochemical and Structural Studies of Conserved Maf Proteins Revealed  
993 Nucleotide Pyrophosphatases with a Preference for Modified Nucleotides.  
994 Chemistry & Biology. 2013;20(11):1386-98.
- 995 84. Gago G, Kurth D, Diacovich L, Tsai SC, Gramajo H. Biochemical and  
996 structural characterization of an essential acyl coenzyme A carboxylase from  
997 Mycobacterium tuberculosis. J Bacteriol. 2006;188(2):477-86.
- 998 85. Desnoyers G, Morissette A, Prevost K, Masse E. Small RNA-induced  
999 differential degradation of the polycistronic mRNA iscRSUA. EMBO J.  
1000 2009;28(11):1551-61.
- 1001 86. Florczyk MA, McCue LA, Stack RF, Hauer CR, McDonough KA.  
1002 Identification and characterization of mycobacterial proteins differentially  
1003 expressed under standing and shaking culture conditions, including Rv2623 from  
1004 a novel class of putative ATP-binding proteins. Infect Immun. 2001;69(9):5777-  
1005 85.
- 1006 87. Bardarov S, Bardarov Jr S, Jr., Pavelka Jr MS, Jr., Sambandamurthy V,  
1007 Larsen M, Tufariello J, et al. Specialized transduction: an efficient method for  
1008 generating marked and unmarked targeted gene disruptions in Mycobacterium  
1009 tuberculosis, M. bovis BCG and M. smegmatis. Microbiology. 2002;148(Pt  
1010 10):3007-17.

- 1011 88. Beauregard A, Smith EA, Petrone BL, Singh N, Karch C, McDonough KA,  
1012 et al. Identification and characterization of small RNAs in *Yersinia pestis*. *RNA*  
1013 *Biol.* 2013;10(3):397-405.
- 1014 89. Darty K, Denise A, Ponty Y. VARNA: Interactive drawing and editing of the  
1015 RNA secondary structure. *Bioinformatics.* 2009;25(15):1974-5.
- 1016 90. Huff J, Czyz A, Landick R, Niederweis M. Taking phage integration to the  
1017 next level as a genetic tool for mycobacteria. *Gene.* 2010;468(1-2):8-19.
- 1018 91. Ding Y, Chan CY, Lawrence CE. Sfold web server for statistical folding  
1019 and rational design of nucleic acids. *Nucleic Acids Res.* 2004;32(Web Server  
1020 issue):W135-41.
- 1021 92. Zadeh JN, Steenberg CD, Bois JS, Wolfe BR, Pierce MB, Khan AR, et al.  
1022 NUPACK: Analysis and design of nucleic acid systems. *J Comput Chem.*  
1023 2011;32(1):170-3.
- 1024 93. Zuker M. Mfold web server for nucleic acid folding and hybridization  
1025 prediction. *Nucleic Acids Research.* 2003;31(13):3406-15.
- 1026 94. Sato K, Hamada M, Asai K, Mituyama T. CENTROIDFOLD: a web server for  
1027 RNA secondary structure prediction. *Nucleic Acids Res.* 2009;37(Web Server  
1028 issue):W277-80.
- 1029 95. Vasudeva-Rao HM, McDonough KA. Expression of the *Mycobacterium*  
1030 *tuberculosis* *acr*-coregulated genes from the DevR (DosR) regulon is controlled by  
1031 multiple levels of regulation. *Infect Immun.* 2008;76(6):2478-89.
- 1032 96. Purkayastha A, McCue LA, McDonough KA. Identification of a *Mycobacterium*  
1033 *tuberculosis* Putative Classical Nitroreductase Gene Whose Expression Is  
1034 Coregulated with That of the *acr* Gene within Macrophages, in Standing versus  
1035 Shaking Cultures, and under Low Oxygen Conditions. *Infection and Immunity.*  
1036 2002;70(3):1518-29.
- 1037



1039 **Figure Legends**

1040

1041 **Figure 1. Secondary Structure modeling of 3' sequences beyond the**

1042 **mapped 3' end of Mcr11.** A. The DNA sequence of the *mcr11* gene and

1043 extended 3' sequence used for modeling experiments is shown. The *mcr11* gene

1044 is shown in capital letters, and nucleotides where 5' and 3' boundaries have been

1045 mapped by RACE are indicated by arrows and shown in capitalized, bolded black

1046 text. Flanking sequences are in italics, and the Rv1264 stop codon in bolded in

1047 red text. The last nucleotide on the 3' side of *mcr11* that was included in

1048 modeling experiments is in bold, lowercase black text. An asterisk indicates 3'

1049 ends reported by DiChiara et al and DeJesus et al. Positions of mapped

1050 nucleotides on the Mtb chromosome are shown above the text. B. Secondary

1051 structure diagrams of Mcr11 from 5' position 1413227 and extended 3' native

1052 sequences. The synthetic idealized intrinsic termination control ( $tt_{sbi}B$ ) is also

1053 modeled onto Mcr11 from the longest 3' end reported at position 1413094; the

1054 last nucleotide of native sequence 3' to Mcr11 is indicated by a black arrow.

1055 Black nucleotides indicate bases in the mapped boundaries of the *mcr11* gene,

1056 red base pairs indicate base pairs beyond the mapped 3' end of Mcr11 at

1057 position 1413107, except all uracils (Us) are shown in blue. An asterisk indicates

1058 that last nucleotide modeled in (C.). C. The secondary structure models with the

1059 lowest minimum free energies (MFE) of a shorter untested native Mcr11 TSE

1060 with the most U rich sequence at the 3' end of the putative terminator. The MFE

1061 of each structure is shown below each diagram.

1062 **Figure 2. TSEs decrease transcriptional read-through of Mcr11-GFPv**  
1063 **reporters, but Mcr11 is not robustly expressed in Msm, even in the**  
1064 **presence of *abmR* from Mtb.** A. A schematic representation of GFPv  
1065 fluorescence-based reporter assay to determine the functionality of TSEs, and a  
1066 synthetic idealized intrinsic termination control ( $tt_{\text{sbI}B}$ ). B. GFPv fluorescence  
1067 assay used to measure promoter activity and read-through of TSEs of *mcr11* in  
1068 late stationary phase Msm, which lacks a native *mcr11* locus. The promoter *Ptuf*  
1069 served as a positive control. The various TSE constructs tested are indicated  
1070 underneath the corresponding bar. Statistical comparisons are relative to  
1071 *Pmcr11*. C. The % termination of constructs tested in (B.). Statistical  
1072 comparisons are relative to TSE1. D. Northern blot analysis of Mcr11 expression  
1073 (M) in Msm with various *mcr11* + TSE constructs. Ten ug of total Msm RNA was  
1074 loaded, whereas 3 ug of the BCG positive control was loaded. The HisT tRNA  
1075 (H) was used as a loading control. E. GFPv fluorescence assay used to measure  
1076 promoter activity in Msm. Statistical comparisons are relative to *Pmcr11* or  
1077 between 24h and 28h as indicated. Results are the means of 3 biological  
1078 replicates. Statistical analysis conducted with an unpaired, 2-tailed Student's t-  
1079 test. Asterisks indicate significance as follows: \*  $p < 0.05$ , \*\*  $p < 0.01$ , \*\*\*  $p < 0.001$ ,  
1080 \*\*\*\*  $p < 0.0001$ .

1081

1082 **Figure 3. Efficiency of TSEs are positively regulated in response to growth**  
1083 **phase in BCG and function significantly better in Mtb.** A. GFPv fluorescence  
1084 assay used to measure promoter activity and read-through of the TSEs of *mcr11*

1085 in mid-log phase BCG in hypoxic (1.3% O<sub>2</sub>, 5% CO<sub>2</sub>), shaking conditions. A  
1086 promoterless (-) construct was used as a negative control and the promoters *Ptuf*  
1087 and *Pgyr* served as positive controls. The various TSE constructs tested are  
1088 indicated underneath the corresponding bar. Statistical comparisons were made  
1089 to *Pmcr11*. B. As in (A), but assayed in late stationary phase. C. A comparison of  
1090 % termination observed in mid-log phase (solid bars) and late stationary phase  
1091 (hatched bars) BCG. Statistical comparisons were made between mid-log and  
1092 stationary phase. D. GFPv fluorescence assay used to measure promoter activity  
1093 and read-through of the TSEs of *mcr11* in mid-log phase Mtb in hypoxic (1.3%  
1094 O<sub>2</sub>, 5% CO<sub>2</sub>), shaking conditions. A promoterless (-) construct was used as a  
1095 negative control and the promoters *Ptuf* and *Pgyr* serve as positive controls. The  
1096 various TSE constructs tested are indicated underneath the corresponding bar.  
1097 Statistical comparisons are made to *Pmcr11*. E. As in (D), but assayed in late  
1098 stationary phase. Statistical comparisons are made to *Pmcr11*. F. A comparison  
1099 of % termination observed in late stationary phase Msm, BCG, and Mtb.  
1100 Statistical comparisons are made to Mtb. Results are the means of 3 biological  
1101 replicates. Statistical analysis conducted with an unpaired, 2-tailed Student's t-  
1102 test. Asterisks indicate significance as follows: \* p<0.05, \*\* p<0.01, \*\*\* p<0.001,  
1103 \*\*\*\* p<0.0001.

1104

1105 **Figure 4. Different Mcr11 TSEs do not alter the size of stable Mcr11.** A.  
1106 Northern blot analysis of Mcr11 expression in the indicated strains of BCG in  
1107 hypoxic (1.3% O<sub>2</sub>, 5% CO<sub>2</sub>) late stationary phase. B. Northern blot analysis of

1108 Mcr11 expression in the indicated strains of Mtb in hypoxic late stationary phase.  
1109 The tRNA HisT is used as a loading control. Results representative of 2-3  
1110 independent repeats.

1111

1112 **Figure 5. Termination at a sub-optimal TSE does not require a trans-gene**

1113 **for stabilization of Mcr11.** A. A schematic of the transgene fusion constructs.

1114 *Mcr11* complementation was provided with (1) or without (2) the transgene GFPv

1115 fused to the end of *mcr11* downstream of sub-optimal terminator TSE1. An

1116 *Mcr11* complementation construct was also tested with TSE3 (3). B. Northern

1117 blot analysis of *Mcr11* expression in Mtb grown to late stationary phase in

1118 hypoxia (1.3% O<sub>2</sub>, 5% CO<sub>2</sub>). HisT was used as a loading control. C. Northern blot

1119 analysis *Mcr11* expression across growth phase in BCG, indicated below. HisT

1120 was used as a loading control. D. qPCR analysis of *Mcr11* expression in mid-log

1121 and late stationary phase BCG, normalized to *sigA* expression. Results are the

1122 representative of 2-3 biological replicates. Statistical analysis conducted with an

1123 unpaired, 2-tailed Student's t-test. Asterisks indicate significance as follows: \*\*

1124 p<0.01, \*\*\* p<0.001.

1125

1126 **Figure 6.  $\Delta mcr11$  has a disrupted *abmR* promoter, resulting in reduced**

1127 **expression of AbmR protein in BCG and Mtb.** A. The *mcr11* locus with the

1128 position of the hygromycin knockout cassette is shown. The regions of DNA used

1129 to create *promoter:lacZ* fusions are shown. Fragment (1.) includes the *Rv1264-*

1130 *abmR* intergenic region, which includes the *mcr11* locus. Fragment (2.) includes

1131 the *mcr11-Rv1265* sequence that is available in the  $\Delta mcr11$  strain. B.  
1132 Quantification of western blot analysis from BCG grown to late-log phase in  
1133 ambient, shaking conditions. C. Quantification of western blot analysis from Mtb  
1134 grown to late-log phase in hypoxic (1.3% O<sub>2</sub>, 5% CO<sub>2</sub>), shaking conditions.  
1135 AbmR was detected with poly-clonal anti-sera, and levels were normalized to  
1136 GlcB levels, as detected by a monoclonal antibody. D.  $\beta$ -Galactosidase activity  
1137 assays using the promoter:*lacZ* fusions shown in (A.) in Wt BCG (gray bars) and  
1138 MTB (black bars) grown to late-log phase in ambient, shaking conditions. An  
1139 asterisk \* indicates p-value < 0.05 using an unpaired Student's t-test. Results  
1140 representative of 2-3 biological repeats.

1141

1142 **Figure 7. Bioinformatic modeling of Mcr11 targets reveals potential**  
1143 **regulatory targets that are involved in central metabolism and cell division.**

1144 A. The organization of the *dlaT-lipB* locus, with the position and potential base-  
1145 pairing interactions between the mRNA and Mcr11 shown below. The  
1146 transcriptional start site of the operon is shown with a thin black arrow. B. As in  
1147 (A.), but for the *accD5-Rv3282* locus. Dashes indicate Watson-Crick base pairs,  
1148 dots indicate non-Watson-Crick base pairs, and a blank space indicates no  
1149 interaction between bases. C. The sequence of the Mcr11 RNA with mapped 5'  
1150 and 3' ends shown in bolded letters. The portion of the sRNA predicted to  
1151 interact with targets shown in (A) and (B) is underlined in black. D. The MFE  
1152 secondary structure of Mcr11 as predicted by RNAstructure, with the portion of  
1153 the sRNA predicted to interact with targets shown in (A) and (B) outlined in black.

1154 **Figure 8.  $\Delta mcr11$  strains of BCG and Mtb are defective for growth in fatty-**  
1155 **acid depleted media and predicted regulatory targets of Mcr11 are**  
1156 **dysregulated at the mRNA level.** A. Mtb was grown for 12 days in under  
1157 hypoxic (1.3% O<sub>2</sub>, 5% CO<sub>2</sub>), shaking conditions in -OA media (7H9 + 0.2%  
1158 glycerol, 10% ADC, and 0.05% Tyloxapol). Gene expression was measured by  
1159 qRT-PCR and normalized to the reference gene *sigA*. Comparison made of each  
1160 strain versus  $\Delta mcr11$ . Complementation strains included a single-copy of *mcr11*  
1161 with TSE3 fused to *GFPv* or a single-copy of the *abmR* locus and *mcr11* with  
1162 TSE4. B. Mtb was grown for 7 days in under hypoxic, shaking conditions in +OA  
1163 media (7H9 + 0.2% glycerol, 10% OADC, and 0.05% Tyloxapol). Gene  
1164 expression was measured by qRT-PCR and normalized to the reference gene  
1165 *sigA*. C. BCG was grown for 12 days in under hypoxic, shaking conditions in -OA  
1166 media. Gene expression was measured by qRT-PCR and normalized to the  
1167 reference gene *sigA*. D. BCG was grown for 12 days in under hypoxic, shaking  
1168 conditions in +OA media. Gene expression was measured by qRT-PCR and  
1169 normalized to the reference gene *sigA*. E. Growth curve of Mtb grown in hypoxic,  
1170 shaking conditions in -OA media. Growth was surveyed by measuring the optical  
1171 density at 620 nm (OD<sub>620</sub>). F. Growth curve of Mtb grown in hypoxic, shaking  
1172 conditions in +OA media. Growth was surveyed by measuring OD<sub>620</sub>. G. As in  
1173 (E.), but with BCG. H. As in (F.), but with BCG. Results are the means of 3  
1174 biological replicates. Statistical comparisons made of each strain versus  $\Delta mcr11$   
1175 using an unpaired, 2-tailed Student's t-test. Asterisks indicate significance as  
1176 follows: \* p<0.05, \*\* p<0.01, \*\*\* p<0.001, \*\*\*\* p<0.0001.

1177 **Figure 9. Model of Mcr11 function in Mtb.**

1178 Expression of mcr11 is activated by cAMP, chronic infection in the lungs of mice,  
1179 and by advancing growth phase and the ATP-binding transcription factor AbmR  
1180 Native 3' sequence elements (TSEs, predicted secondary structure shown in red)  
1181 promote the transcriptional termination and stability of Mcr11. The predicted  
1182 secondary structure of mature Mcr11 is shown in black. Mcr11 regulates the  
1183 expression of genes involved in the central metabolism and growth of Mtb,  
1184 possibly through a base-pairing interaction between Mcr11 and target mRNAs.  
1185 Mcr11 is required for the optimal growth of Mtb in the absence of fatty acids  
1186

1188 **Supporting information**

1189 **S1 Figure. Generation and confirmation of *mcr11* knock-out and**  
1190 **complementation strains.** A. A diagram of the *mcr11* locus and the relative  
1191 position of the hygromycin resistance cassette. Lines with arrows indicated the  
1192 DNA sequence included in the various listed complementation strains. B. PCR  
1193 confirmation of *mcr11* knockout and complementation strains of BCG. C. PCR  
1194 confirmation of *mcr11* knockout and complementation strains of Mtb. D. Northern  
1195 blot analysis of the indicated strains of BCG from 3  $\mu$ g of total RNA harvested  
1196 from late stationary phase cultures grown in hypoxic (1.3% O<sub>2</sub>, 5% CO<sub>2</sub>), shaking  
1197 conditions. E. Northern blot analysis of the indicated strains of Mtb from 5  $\mu$ g of  
1198 total RNA harvested from late-log phase cultures grown in hypoxic (1.3% O<sub>2</sub>, 5%  
1199 CO<sub>2</sub>), shaking conditions. The number above the lane indicates the identity of  
1200 each sample. The column to the left of the rows indicates which gene was  
1201 amplified or which RNA was probed by Northern blot.

1202 **S2 Figure. FACS analysis of TSEs in Msm.** FACS analysis of GFPv  
1203 fluorescence of 20,000 events for each sample as indicated by the label to the  
1204 left of the histogram. Representative of three independent repeats.

1205 **S3 Figure. *abmR* contributes to the termination of Mcr11 transcripts.** A.  
1206 GFPv fluorescence assay used to measure *mcr11* promoter activity in mid-log  
1207 phase Mtb in hypoxic (1.3% O<sub>2</sub>, 5% CO<sub>2</sub>), shaking conditions. B. The %  
1208 termination in mid-log phase. The various TSE constructs tested are indicated  
1209 underneath the corresponding bar. C. Promoter reporter assay as in (A), but in  
1210 late stationary phase. D. The % termination, as in (B), but in late stationary



1211 phase. Results representative of 3 biological replicates. Statistical analysis  
1212 conducted with an unpaired, 2-tailed Student's t-test. Comparison made versus  
1213 *Mtb*Δ*abmR* in A. and C., and versus Wt in B. and D. Asterisks indicate  
1214 significance as follows: \* p<0.05, \*\* p<0.01, \*\*\* p<0.001, \*\*\*\* p<0.0001.

1215 **S4 Figure. Secondary structure of Mcr11 RNA generated by multiple**  
1216 **modeling algorithms.** A. The CentroidFold secondary structure using the  
1217 CONTRAfold inference engine. B. The -54.40 kcal/mol MFE structure generated  
1218 using Mfold. C. The -45.40 kcal/mol MFE structure generated using NUPACK. D.  
1219 The RNAfold centroid structure. E. The -54.00 kcal/mol MFE structure generated  
1220 using RNAfold. F. The -53.80 kcal/mol MFE structure generated using  
1221 RNAstructure. G. The ensemble centroid structure generated using Sfold. H. The  
1222 -54.40 kcal/mol MFE structure generated using Sfold.

1223 **S5 Figure. Protein levels of predicted regulatory targets of Mcr11 are not**  
1224 **dysregulated in Mtb**Δ*mcr11* **during hypoxia in the absence of added fatty**  
1225 **acids.** A. *Mtb* was grown for 12 days in under hypoxic, shaking conditions in -OA  
1226 media. Gene expression was measured by qRT-PCR and normalized to the  
1227 reference gene *sigA*. Comparison made of each strain versus *Mtb*Δ*mcr11*. B. *Mtb*  
1228 was grown for 12 days in under hypoxic (1.3% O<sub>2</sub>, 5% CO<sub>2</sub>), shaking conditions  
1229 in Middlebrook 7H9 + 0.2% glycerol, 10% ADC, and 0.05% Tyloxapol (-OA)  
1230 media. Protein levels were assayed by Western blot analysis with polyclonal α-  
1231 Lipoate, polyclonal α-PknA, and monoclonal α-GlcB antibodies. GlcB serves as a  
1232 loading and transfer control. Representative of three biological repeats.

1233 **S6 Figure. Regulation of predicted targets of Mcr11 is condition specific in**

1234 **BCG and Mtb.** A. BCG grown for 12 days in under hypoxic (1.3% O<sub>2</sub>, 5% CO<sub>2</sub>),

1235 shaking conditions in Middlebrook 7H9 + 0.2% glycerol, 10% OADC, and 0.05%

1236 Tyloxapol (+OA). Gene expression was measured by qRT-PCR and normalized

1237 to the reference gene *sigA*. G.-H. Mtb was grown for 7 days in under hypoxic

1238 (1.3% O<sub>2</sub>, 5% CO<sub>2</sub>), shaking conditions in Middlebrook 7H9 + 0.2% glycerol, 10%

1239 OADC, and 0.05% Tween (+OA) and treated with vehicle control (Control) or 10

1240 mM dibutyryl cAMP on day 3 (+db cAMP). Gene expression was measured by

1241 qRT-PCR and normalized to the reference gene *sigA*. Representative of 2-3

1242 biological repeats. Statistical analysis conducted with an unpaired, 2-tailed

1243 Student's t-test. Comparison made of each strain versus *Δmcr11*. Asterisks

1244 indicate significance as follows: \* p<0.05, \*\* p<0.01, \*\*\* p<0.001, \*\*\*\* p<0.0001.

1245 **S1 Table. Plasmids used in the study.**

1246 **S2 Table. Primers used in the study.**

1247 **S3 Table. Stress does not impact the efficiency of TSEs in BCG or Mtb.**

1248 **S4 Table. Results of TargetRNA and TargetRNA2 predictions of Mcr11**

1249 **regulatory targets.**

1250

**A.**

1413227  
 5' *ttttggt* **ATCG** *AAGCAGGCCCGGTTAGTGACCAATCGAAAGTGCCGGAAGACGGGGTGAAGGCCGGCCGCGCAAGACCCGCAGAAGGGCGGTGTCAG*

1413107      1413094  
 \*      \*  
 ACGCCCCCGAGAGTCACGCCGGGTCTGCC**CA** *atgtgtaccggtgtgcctgcta* *cggtgacgagccggccaaatcgtcgtcttgggccgcgcccgcg*

*agccggtgcgagtgggcccctcgccggactcgaaaaagcctgacgtcacc* **ccggattc** 3'

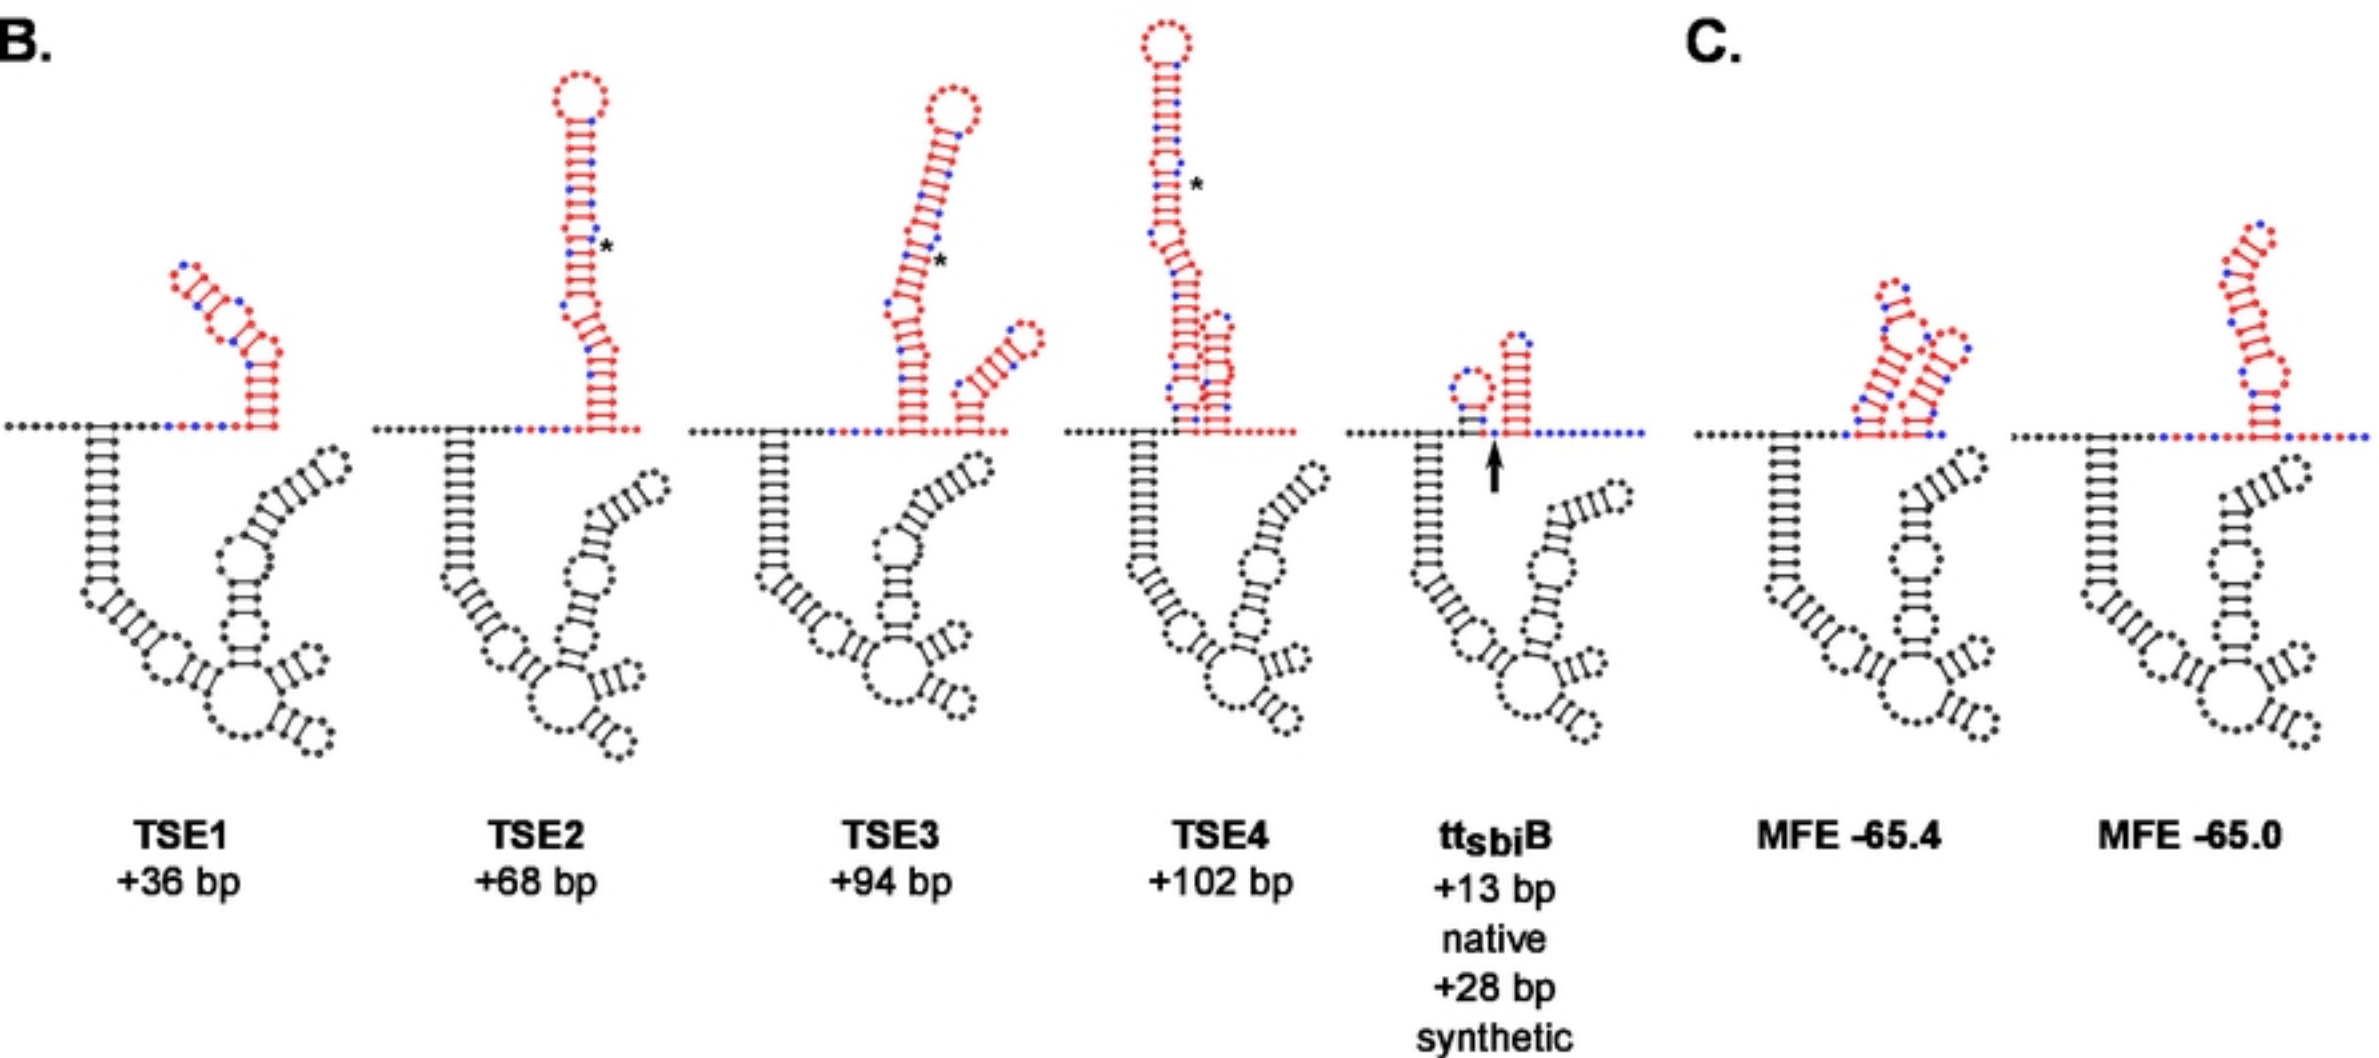

Figure 1

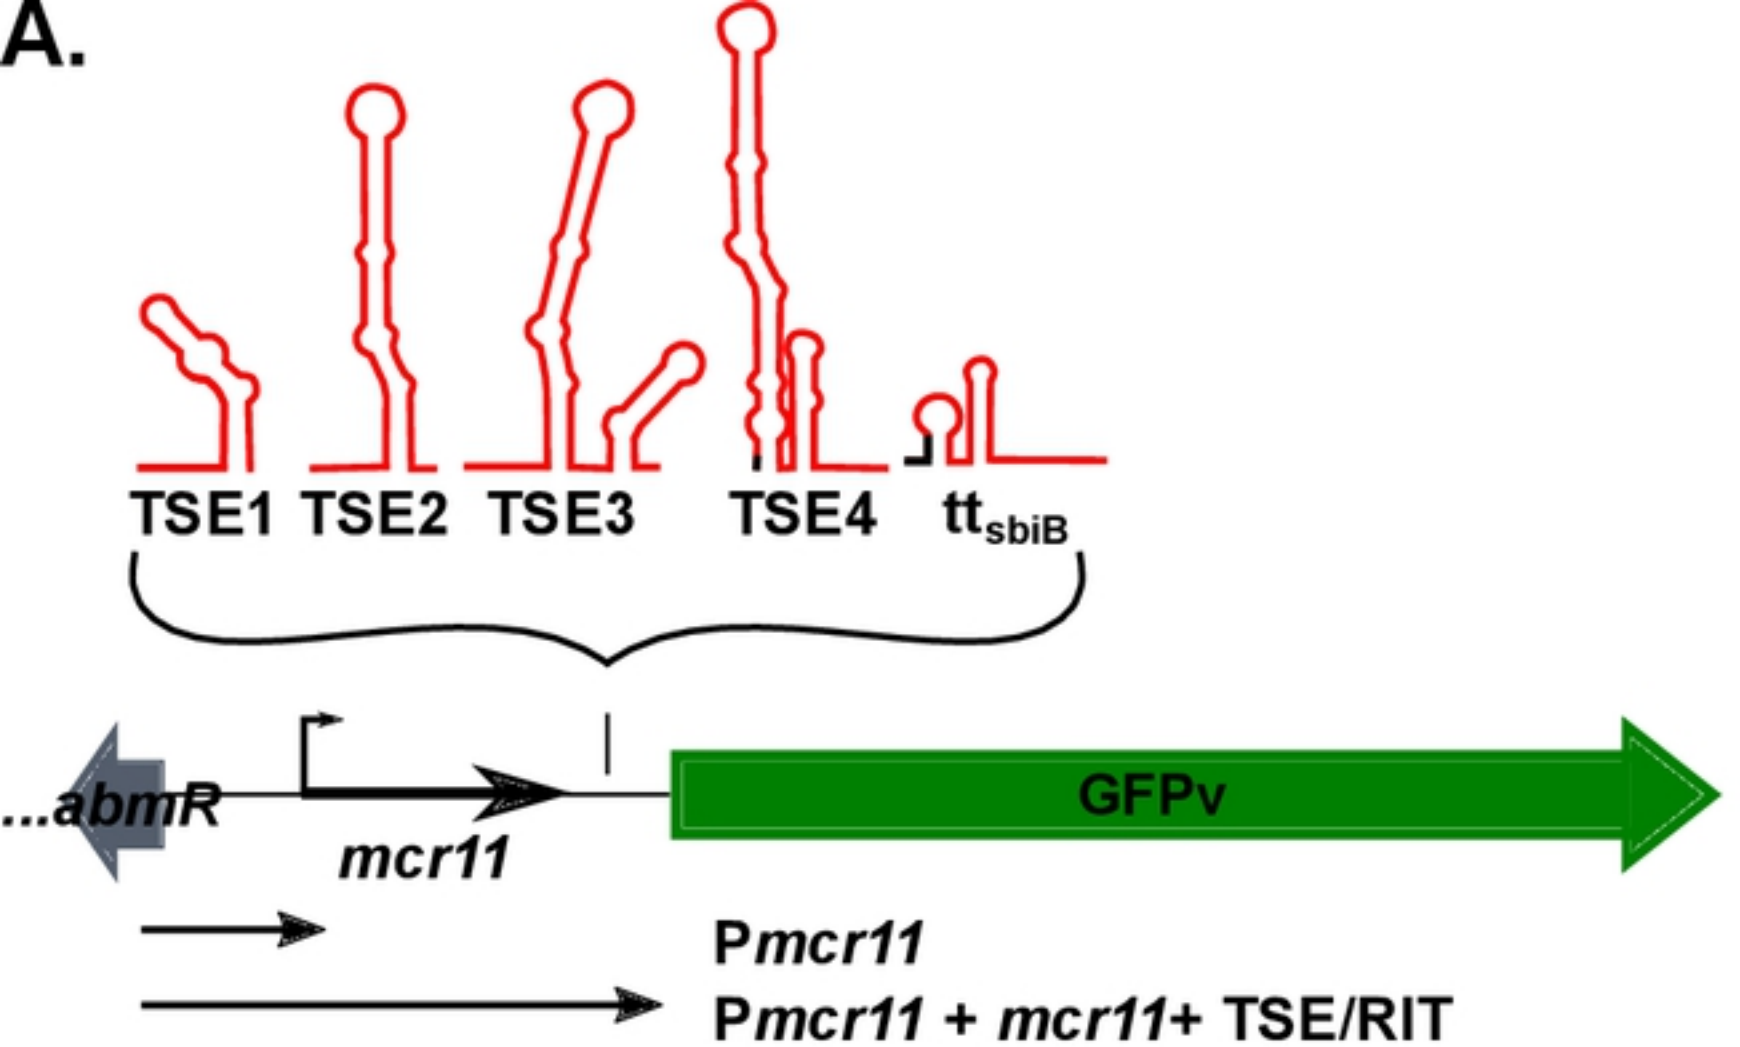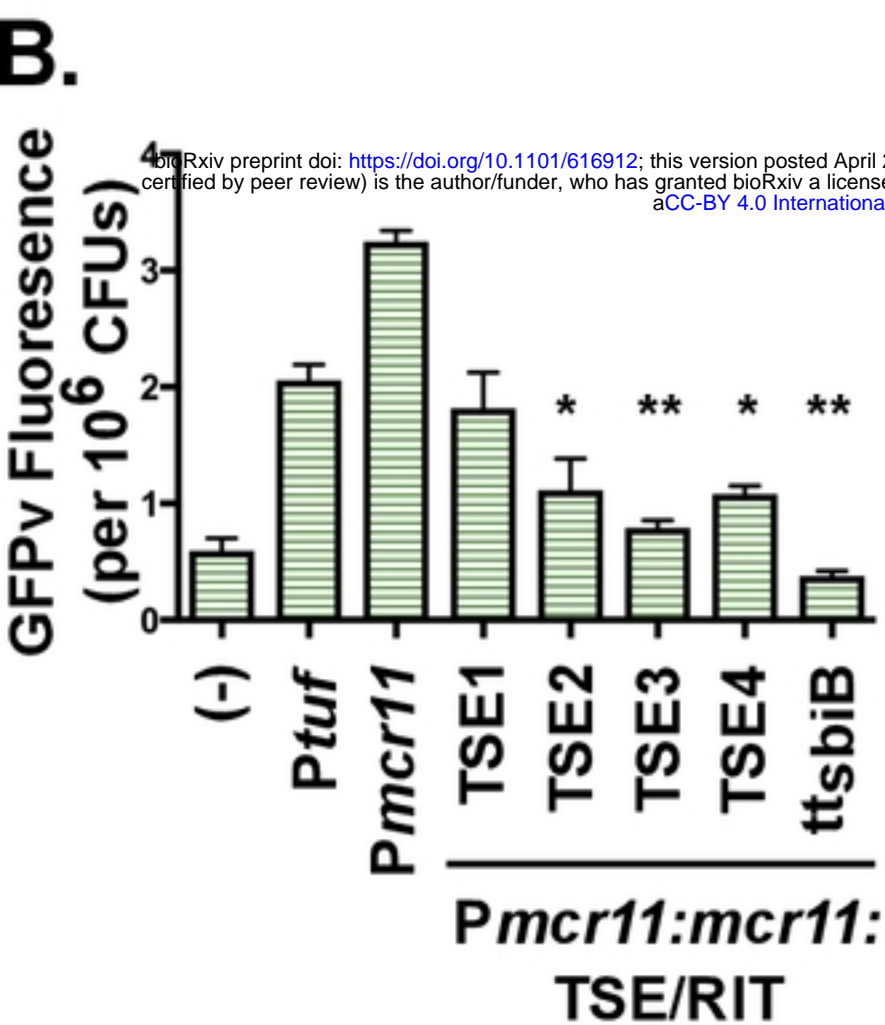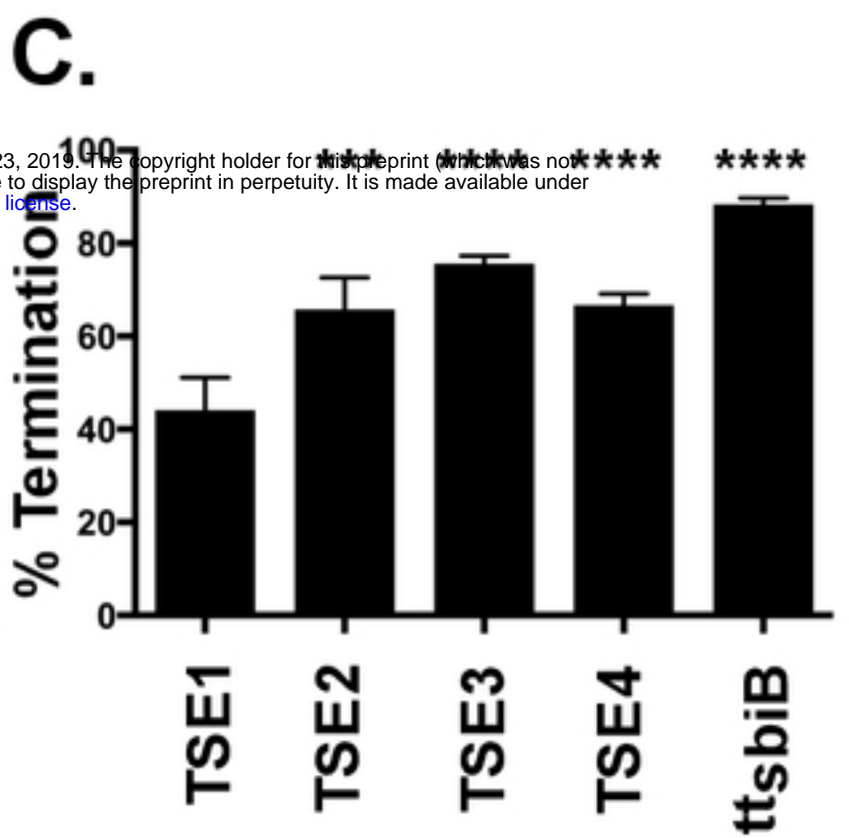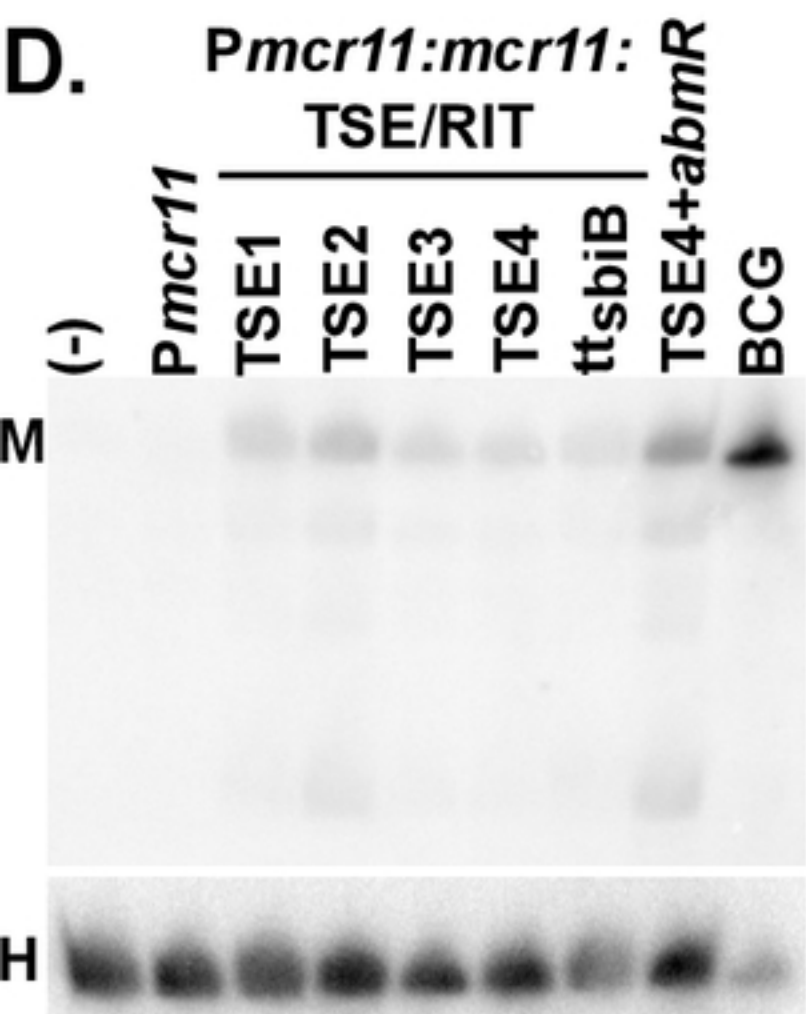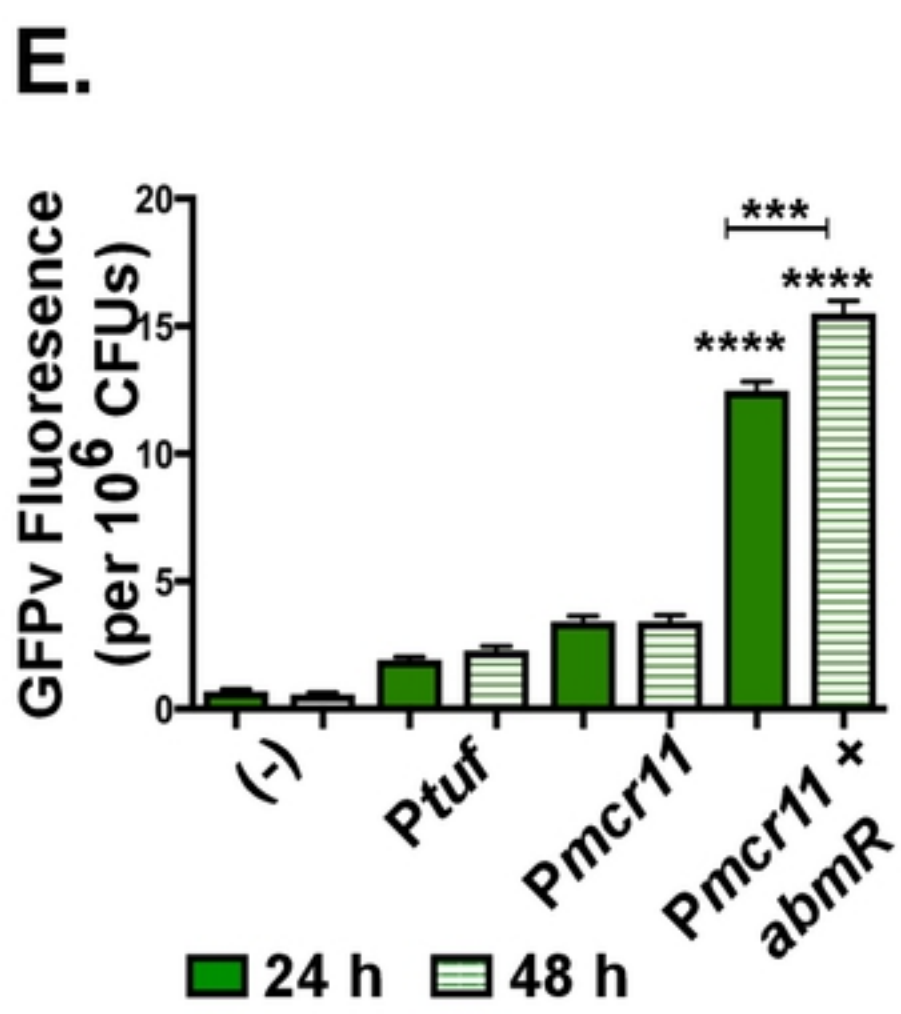

Figure 2

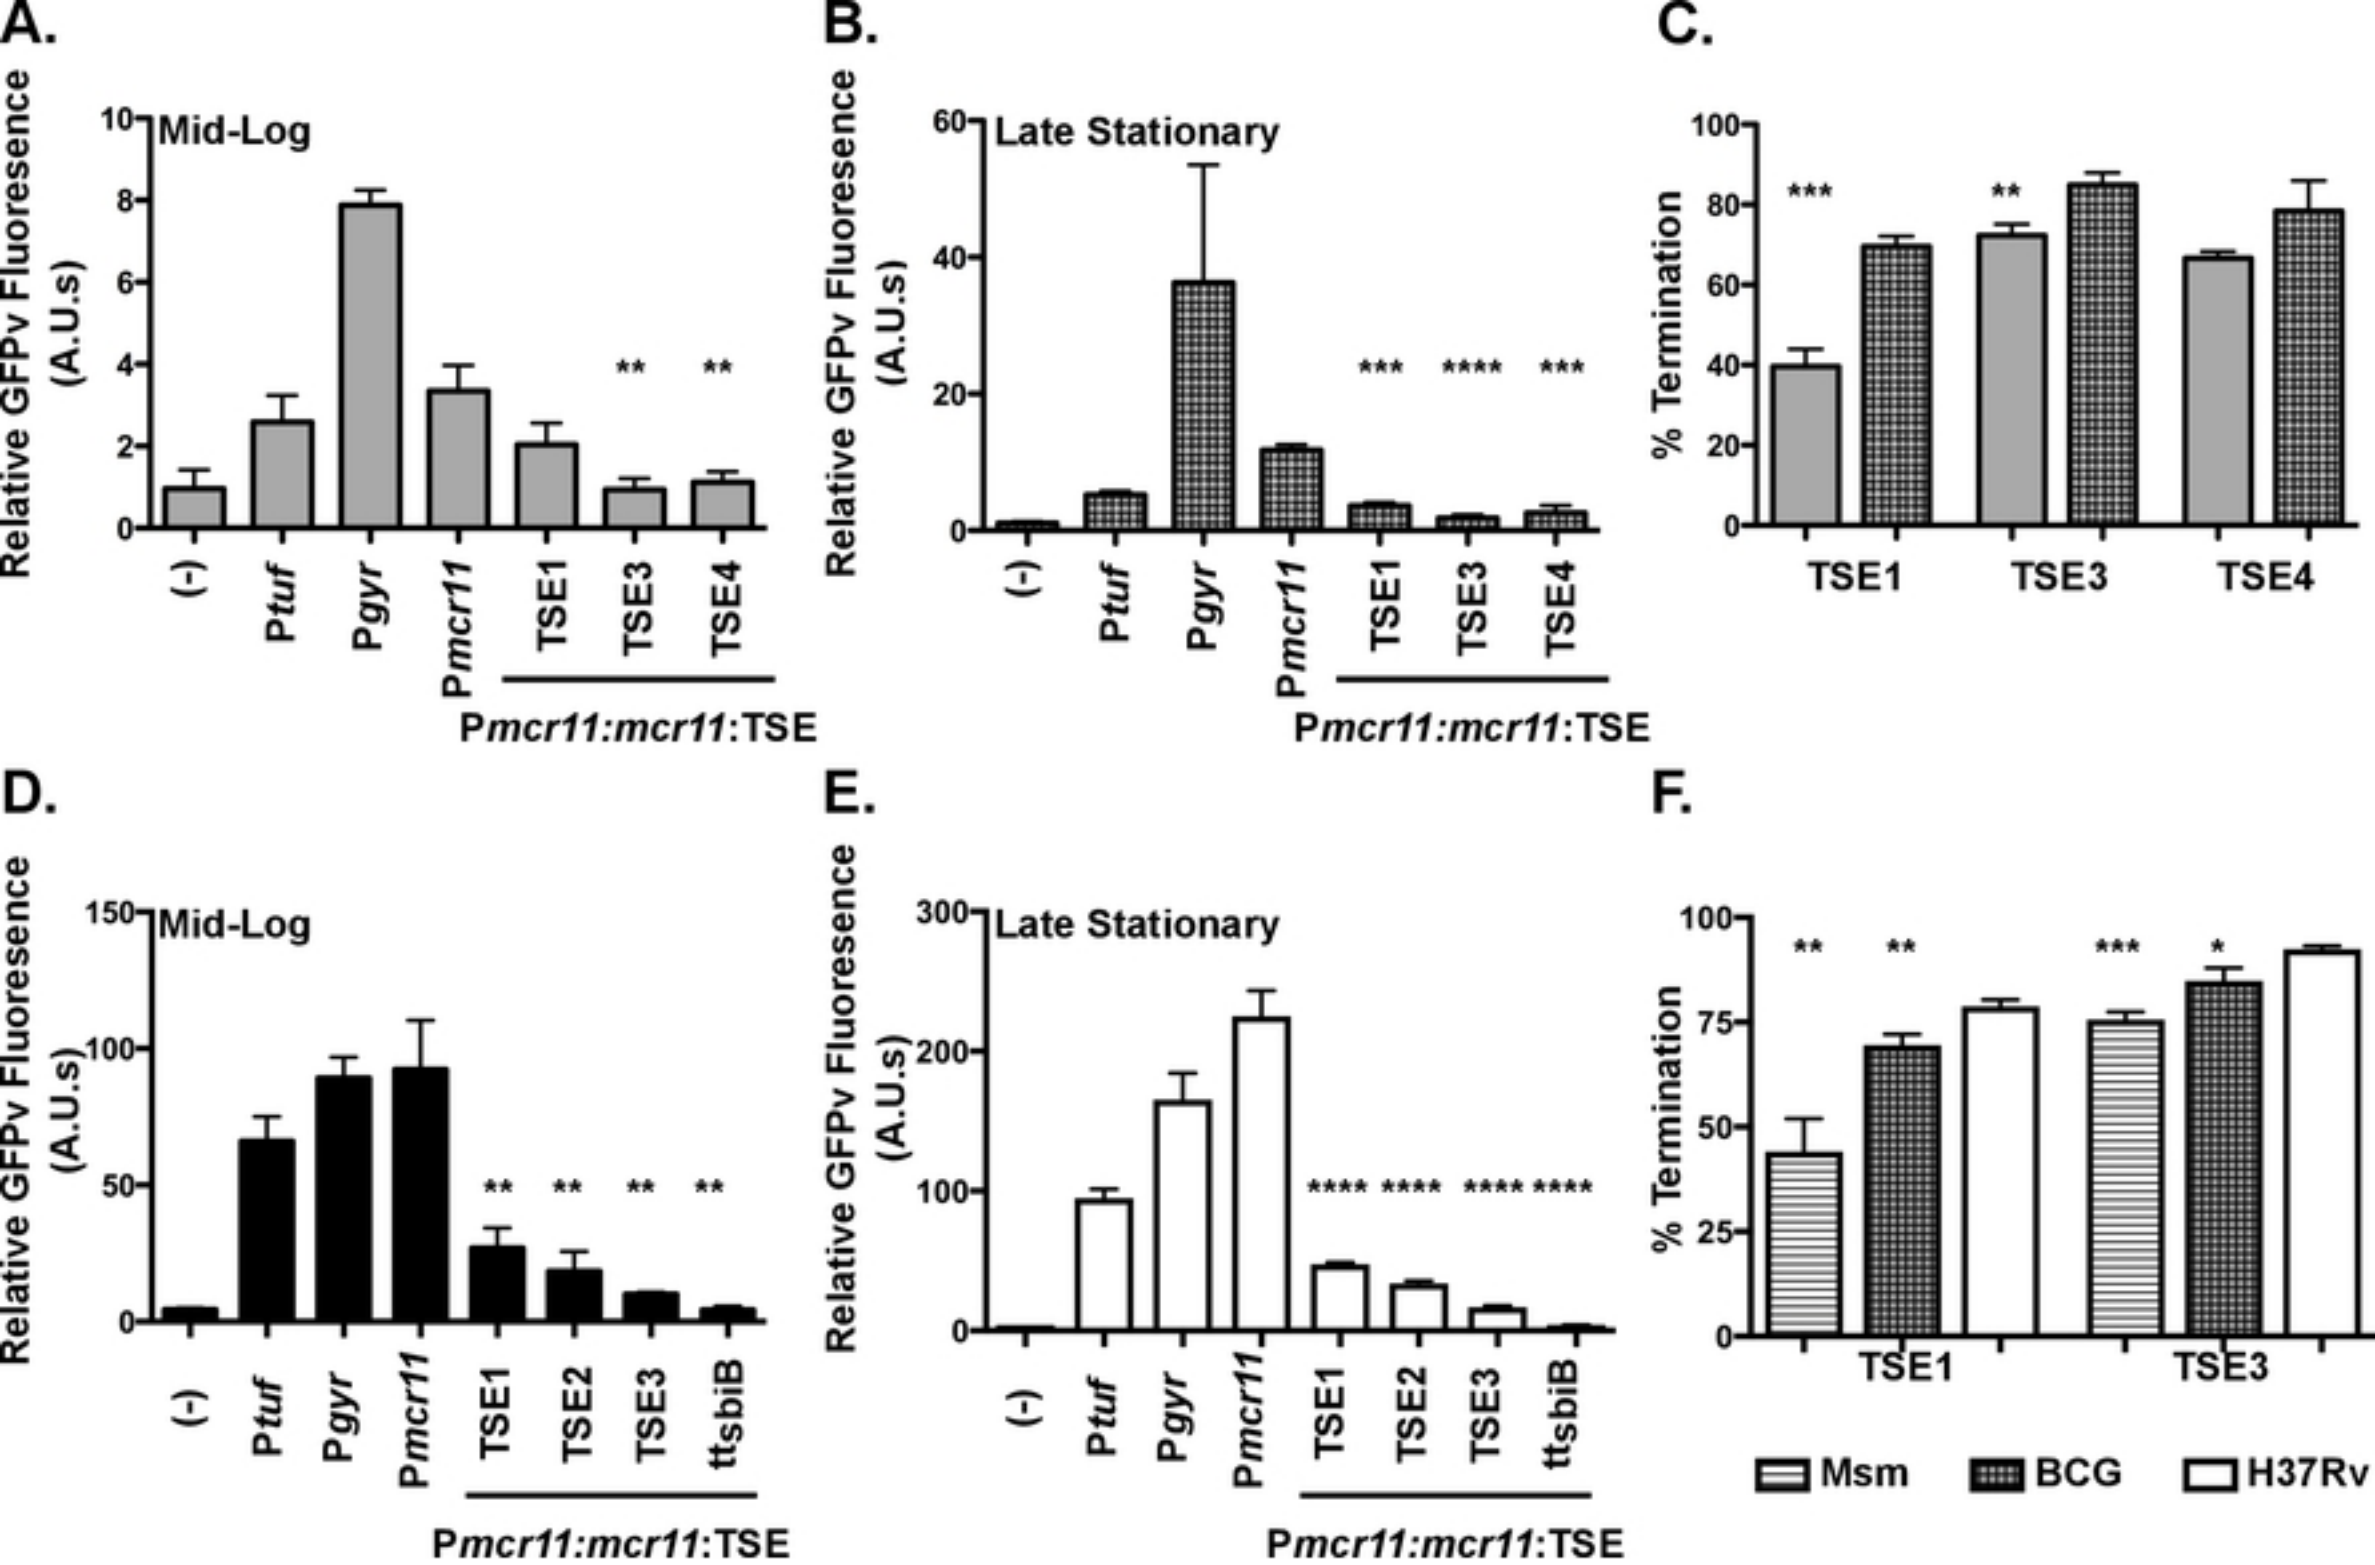

Figure 3

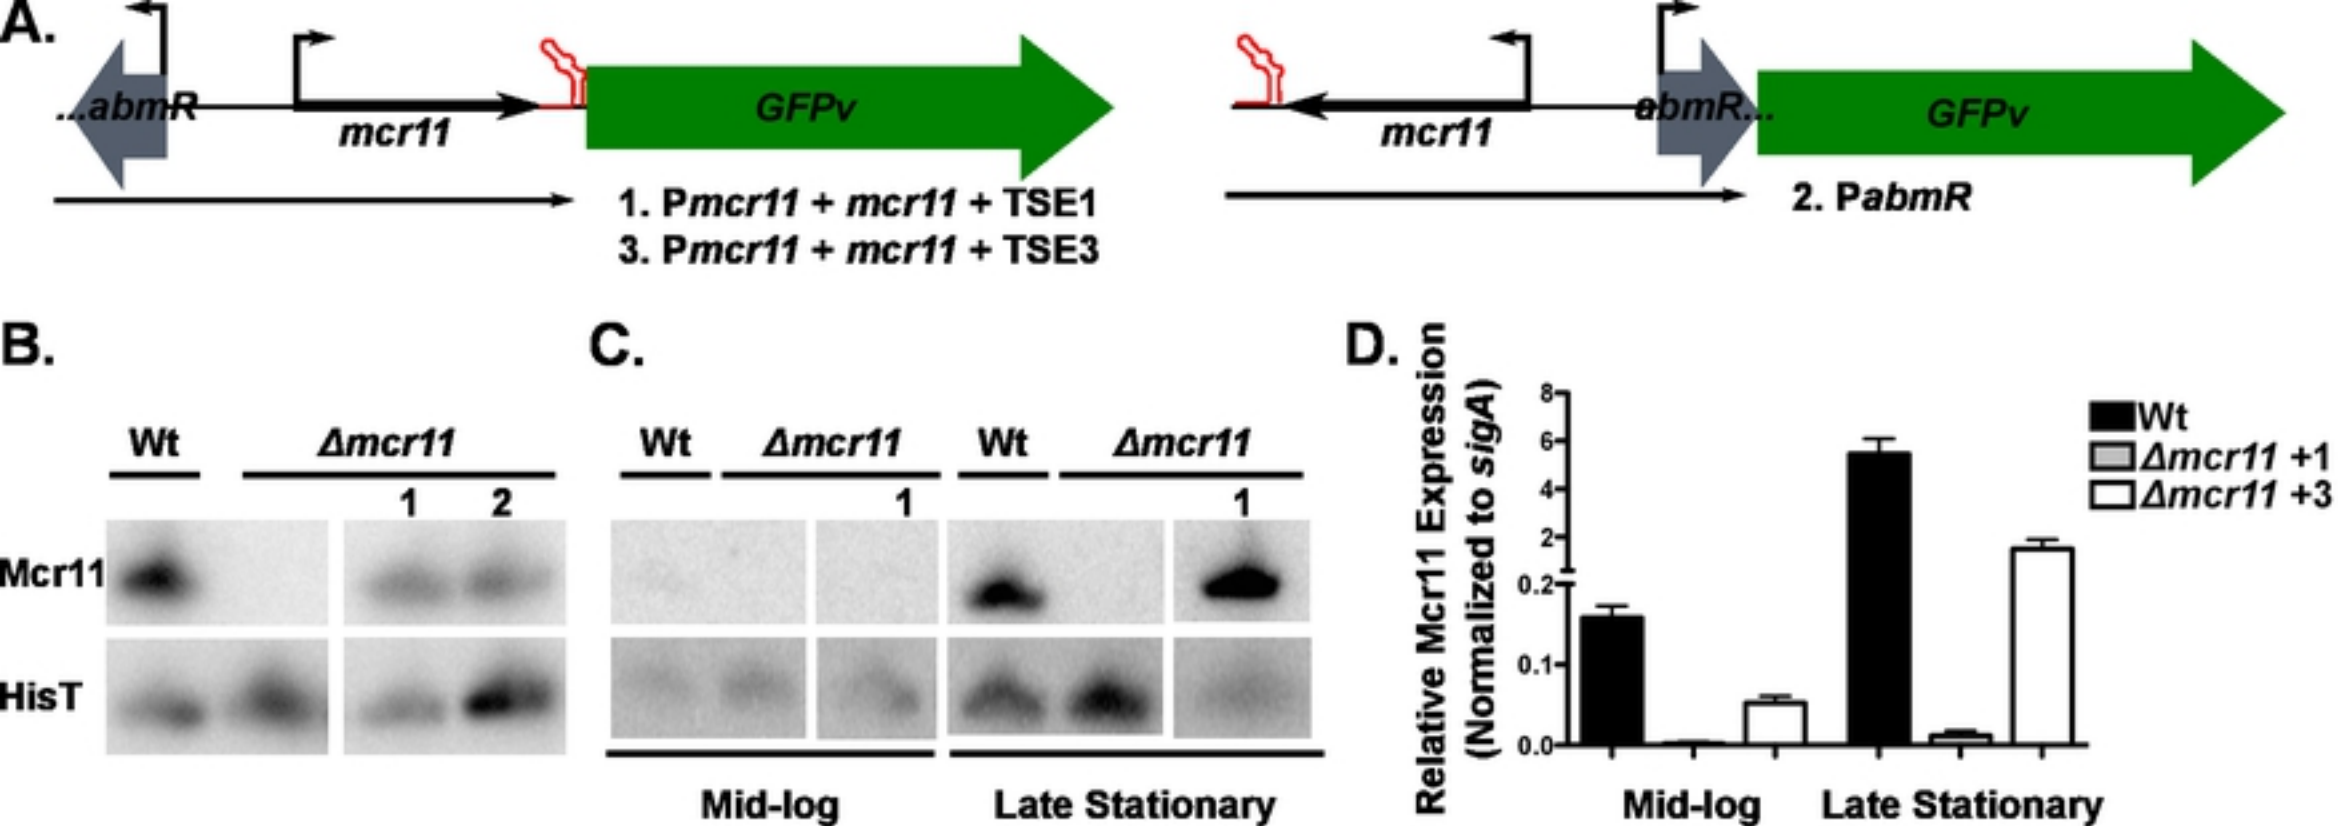

Figure 5

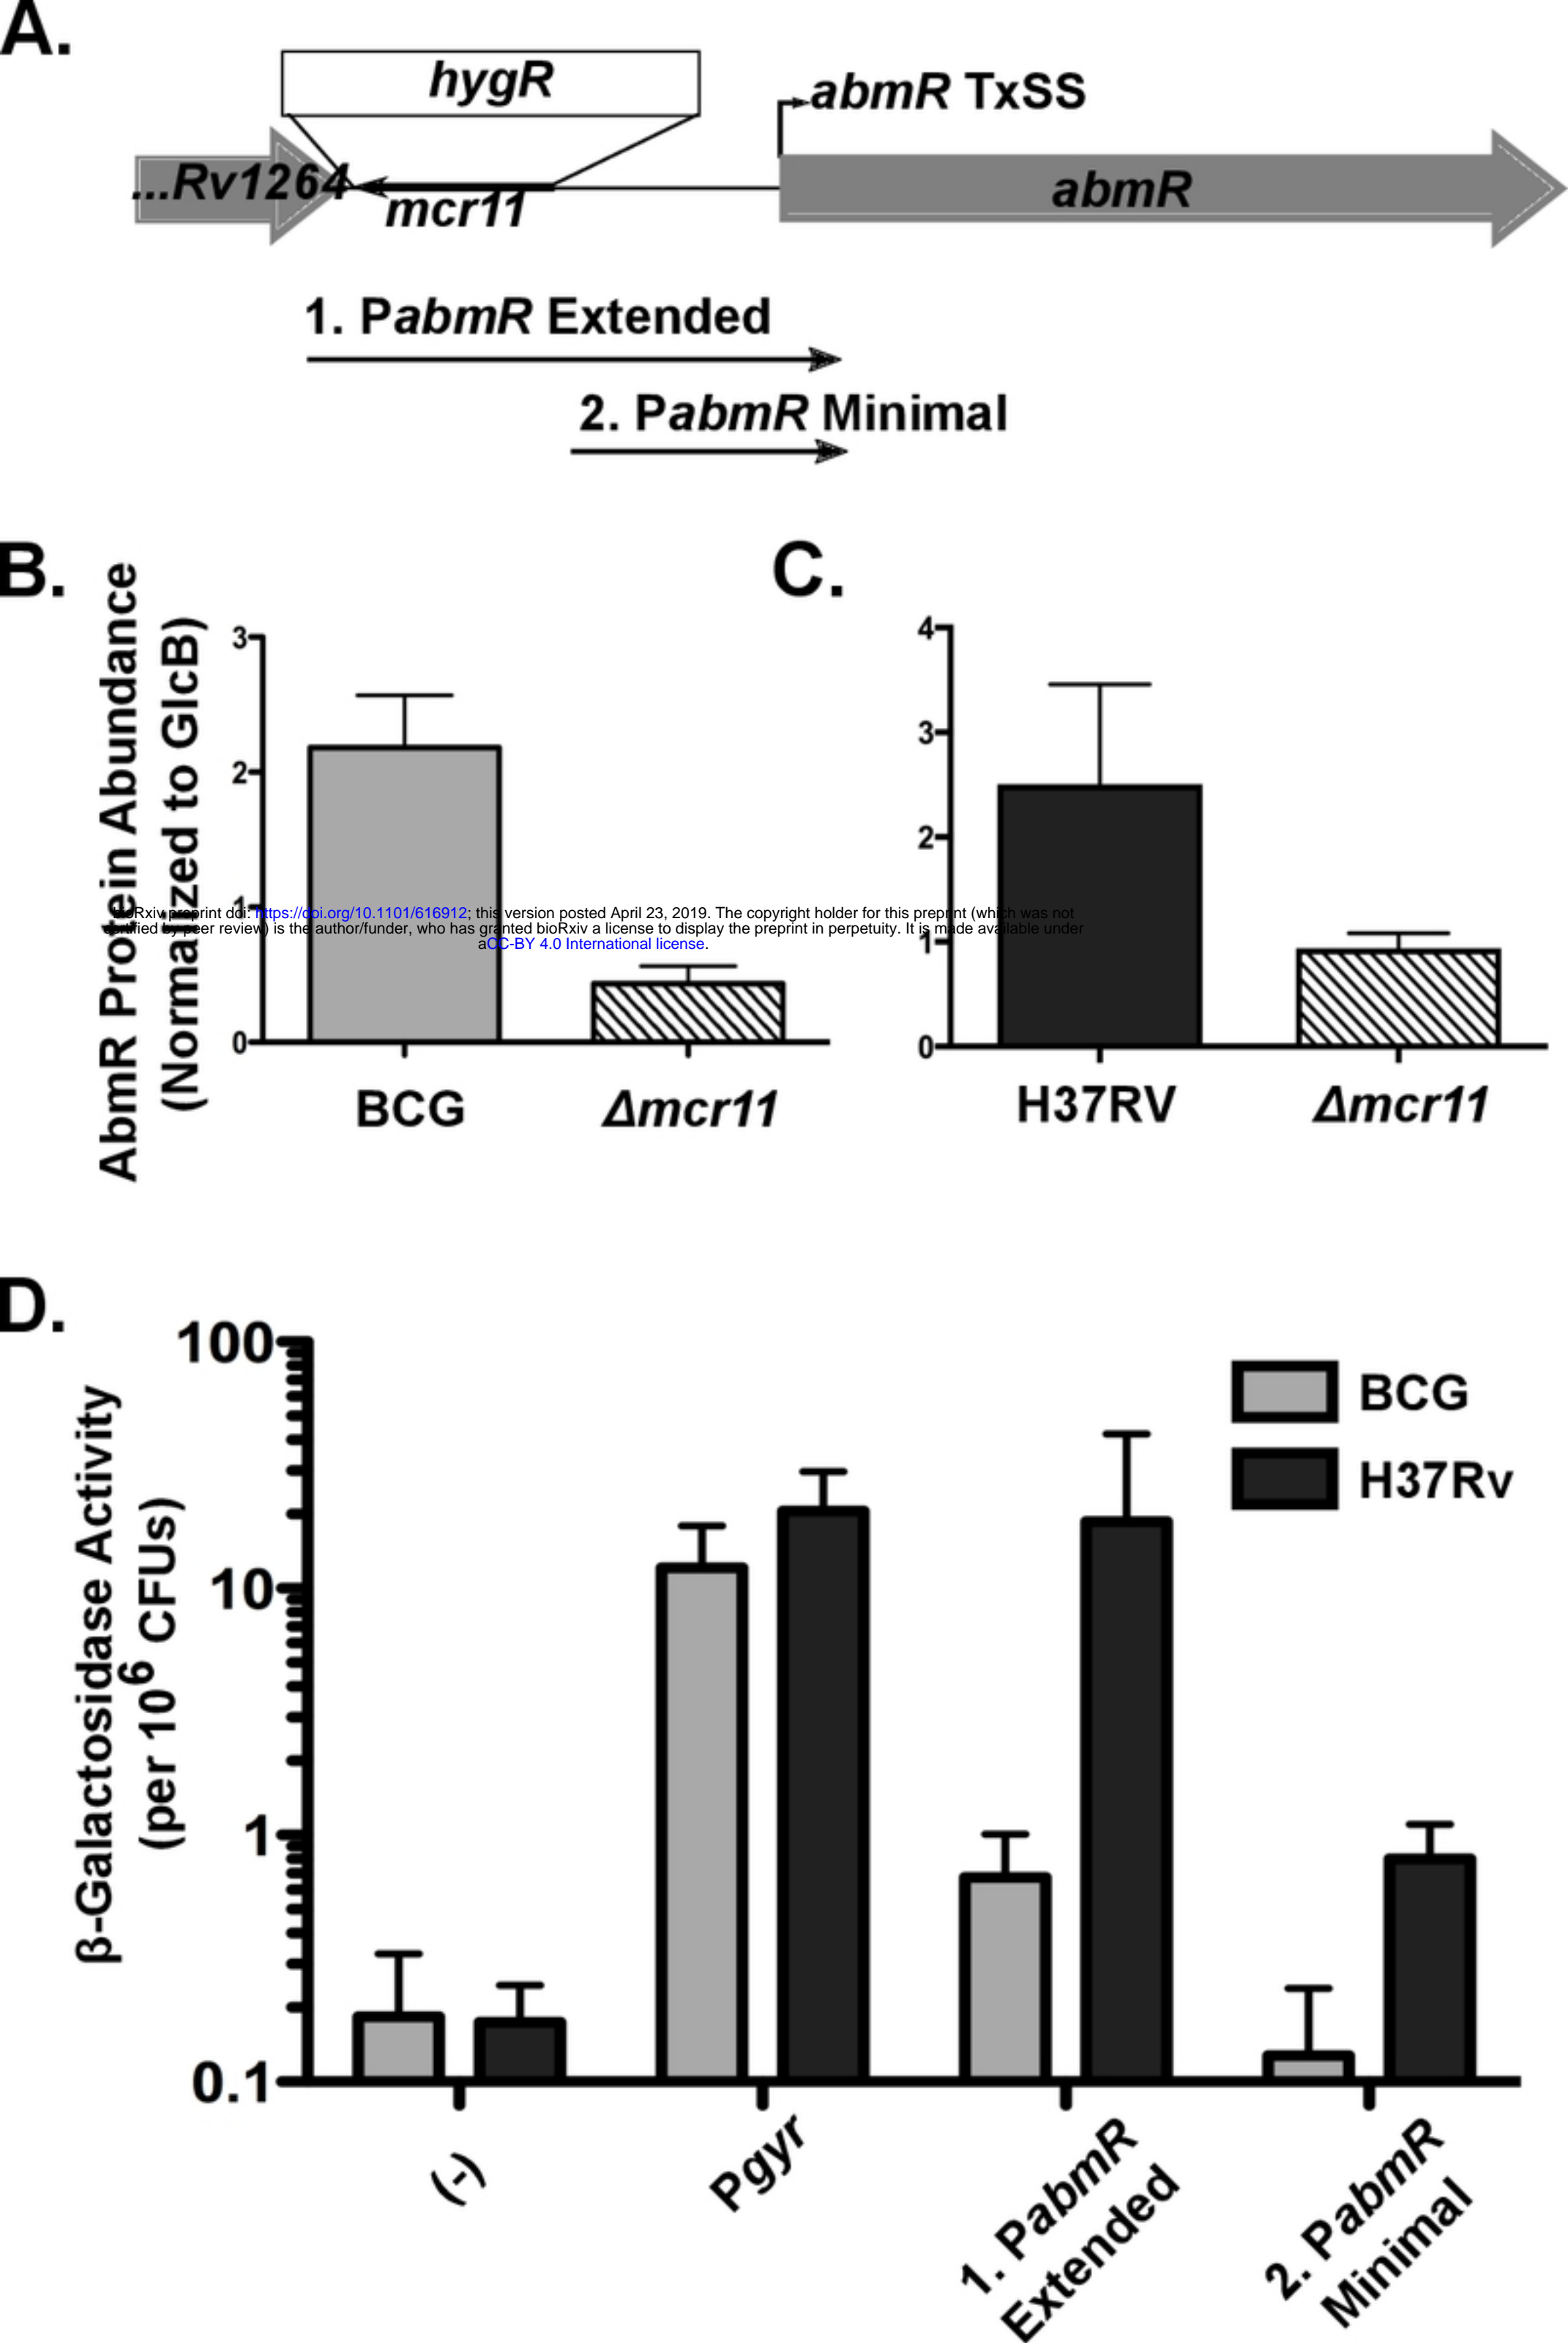

Figure 6

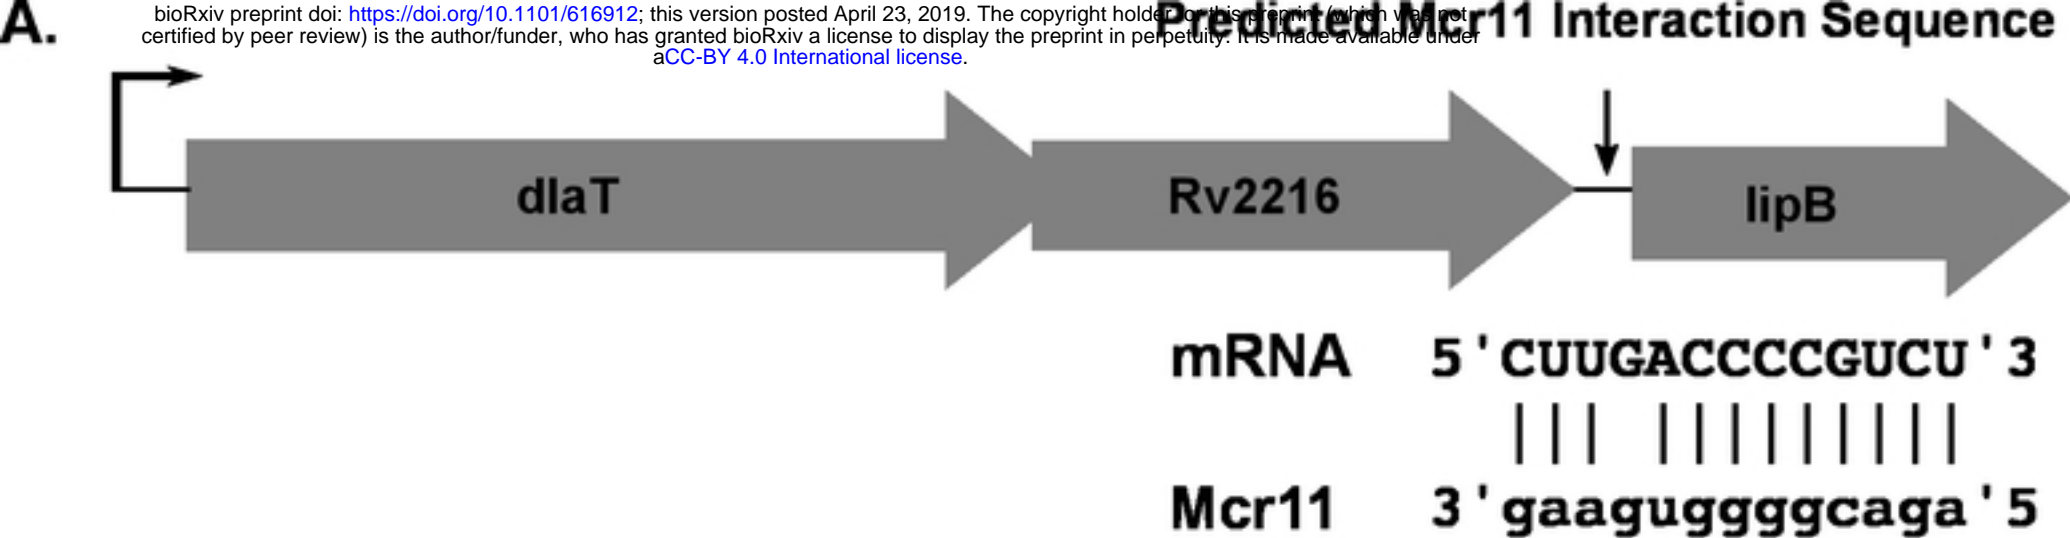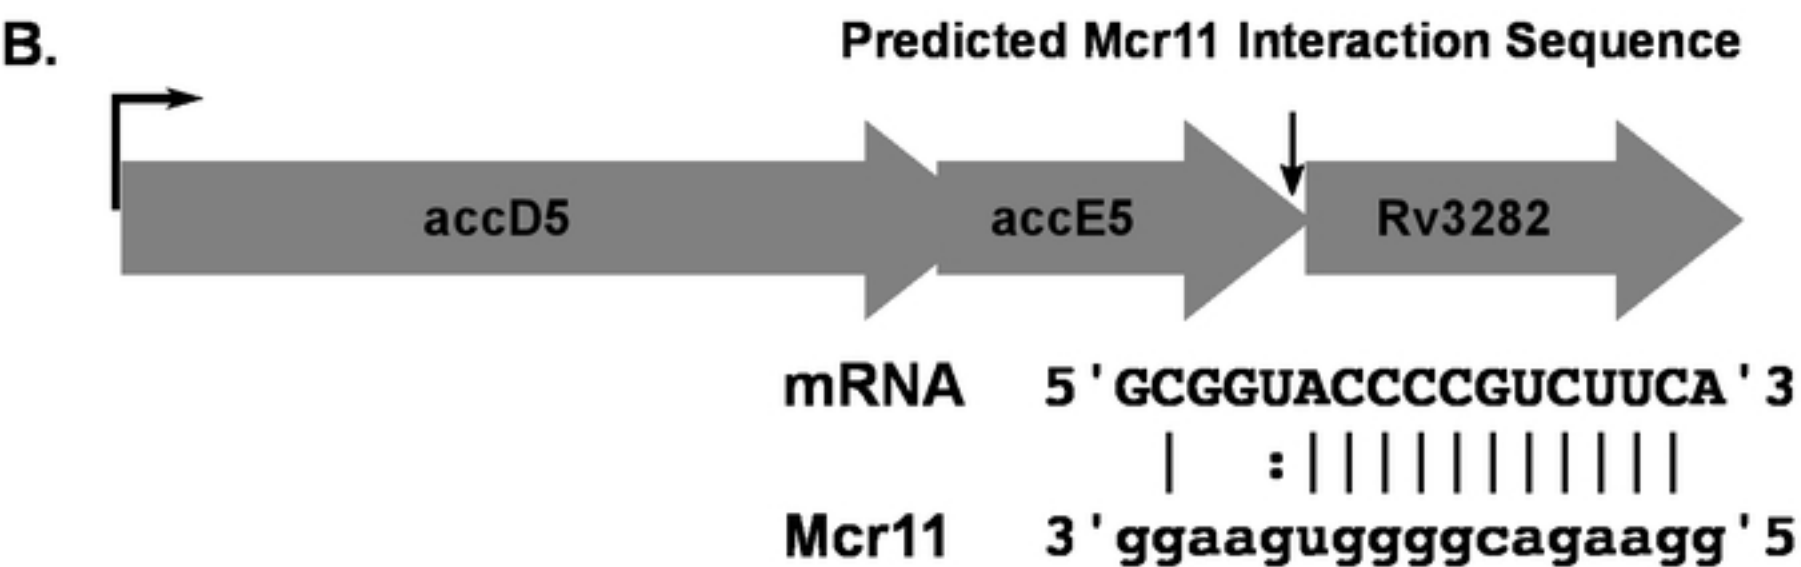

**C.** 5' **ATCGAAGCAGGCCCGGTTAGTGACCAATCGAAAGTGCCGGAAGA**  
**CGGGGTGAAGGCCGGCCGCGCAAGACCCGCAGAAGGCGGGTGTCAGA**  
**CGCCCCCGAGAGTCACGCCGGGTCTGCCCA** 3'

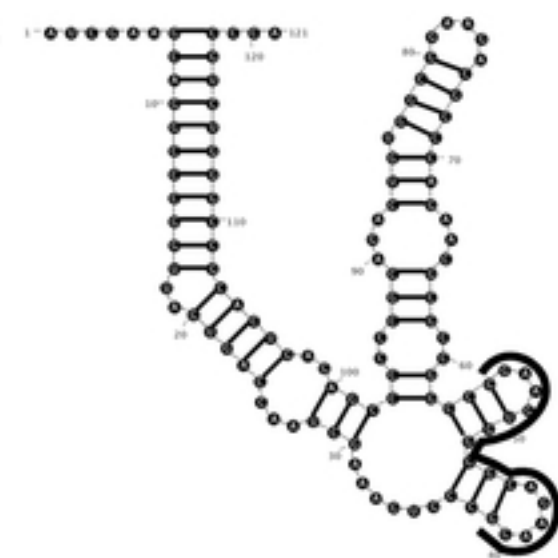

Figure 7



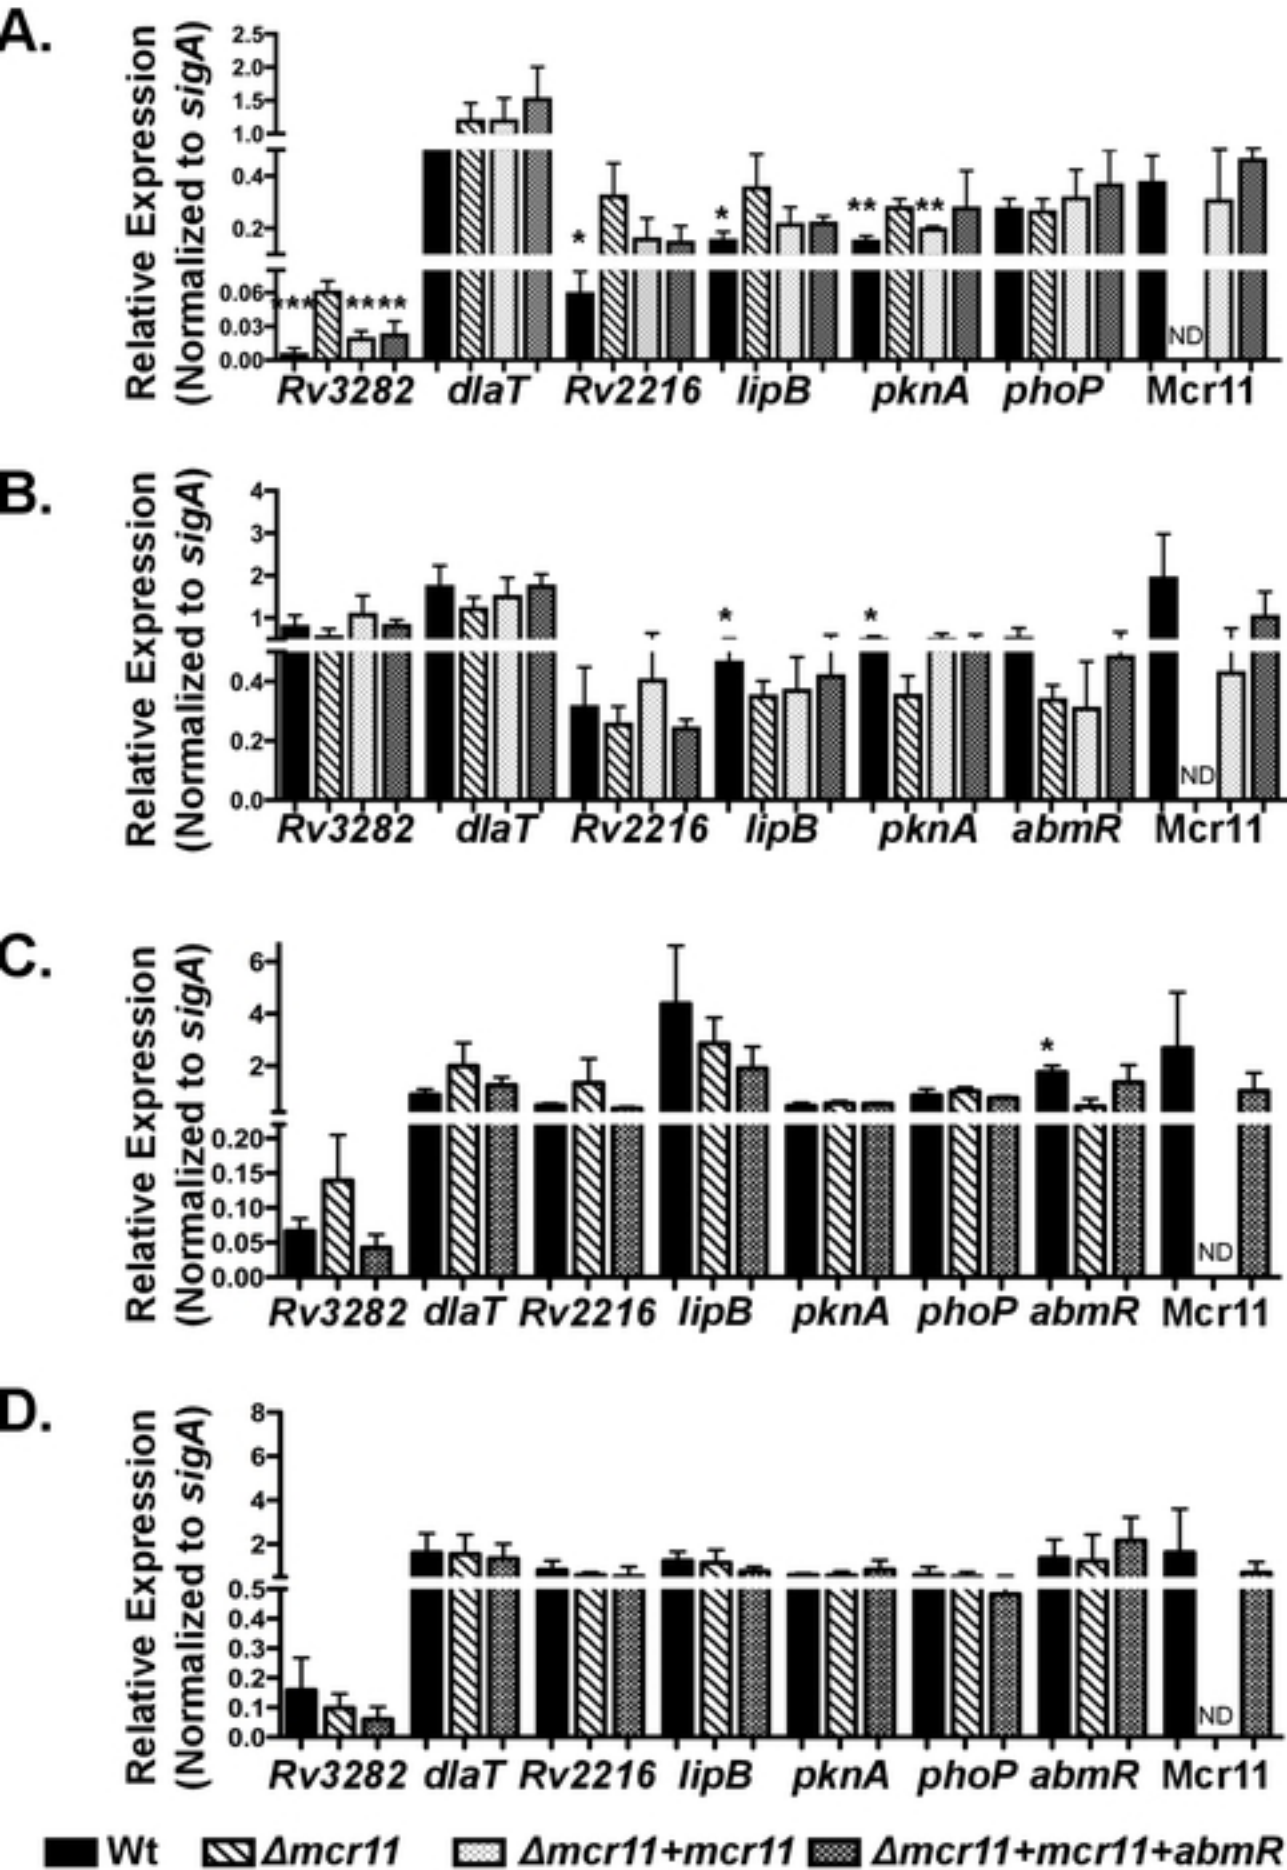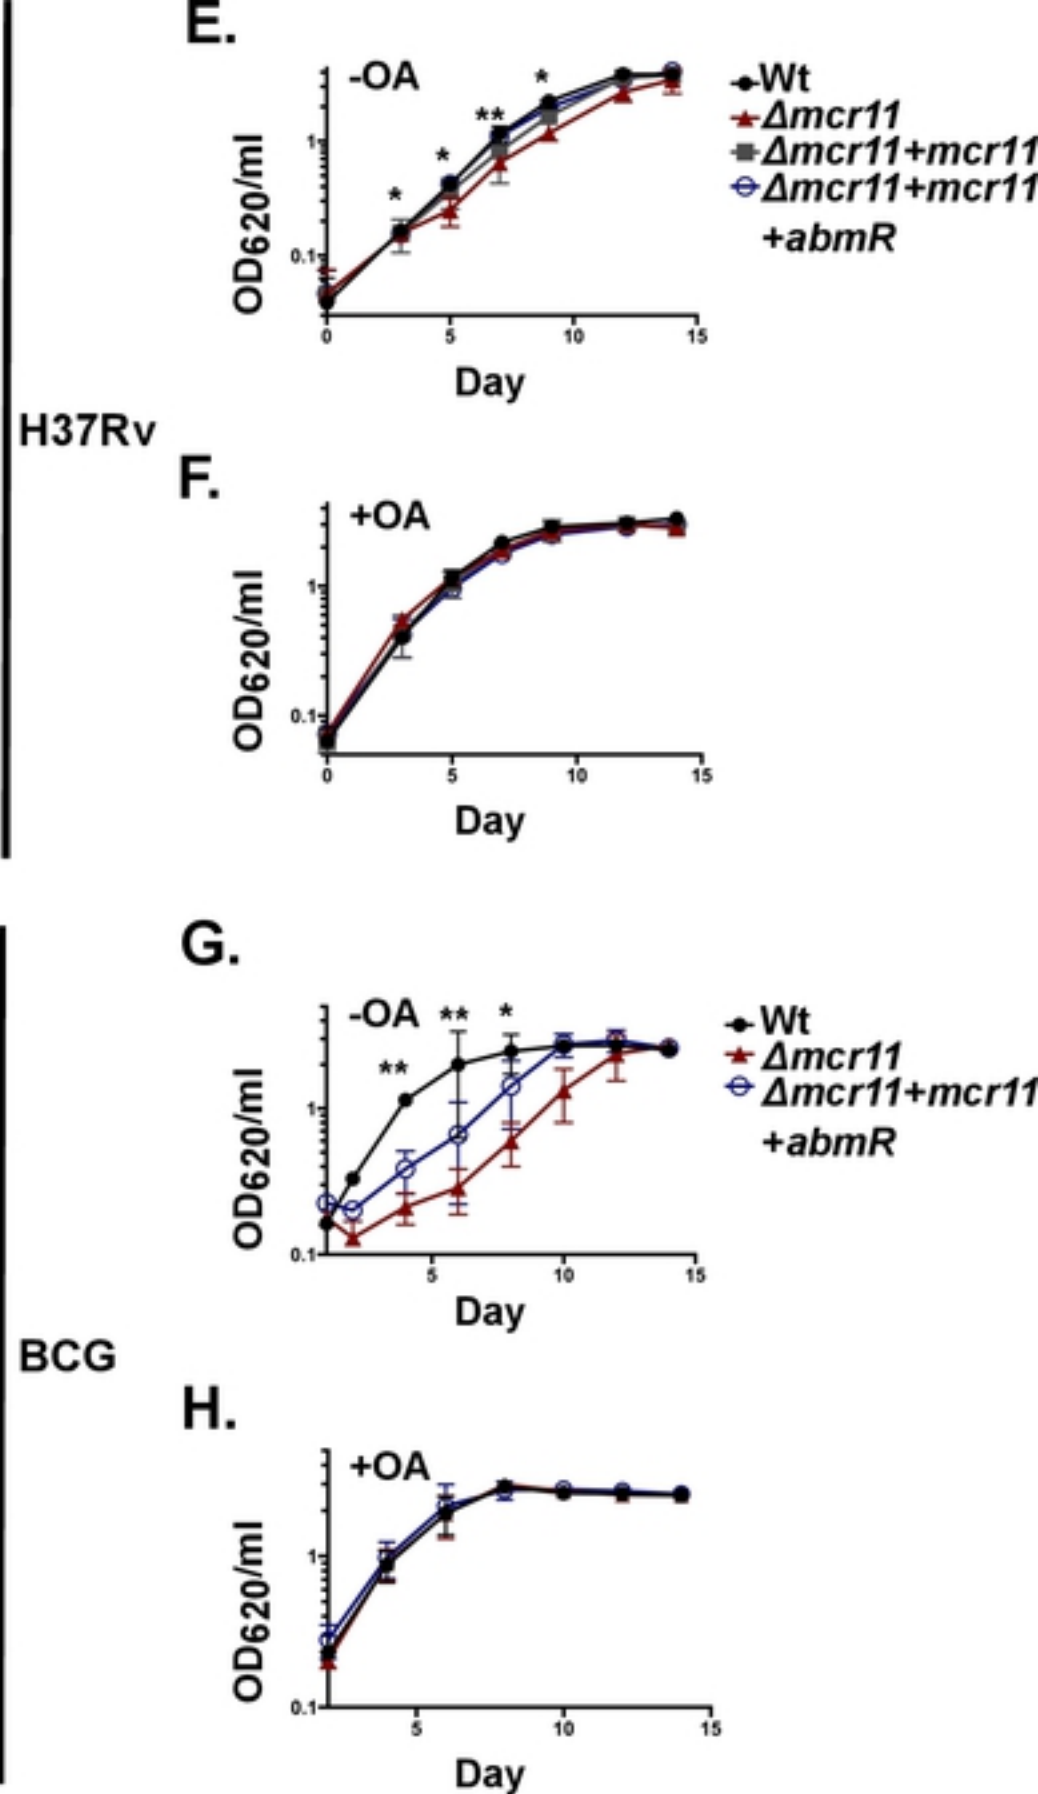

Figure 8

Figure 8

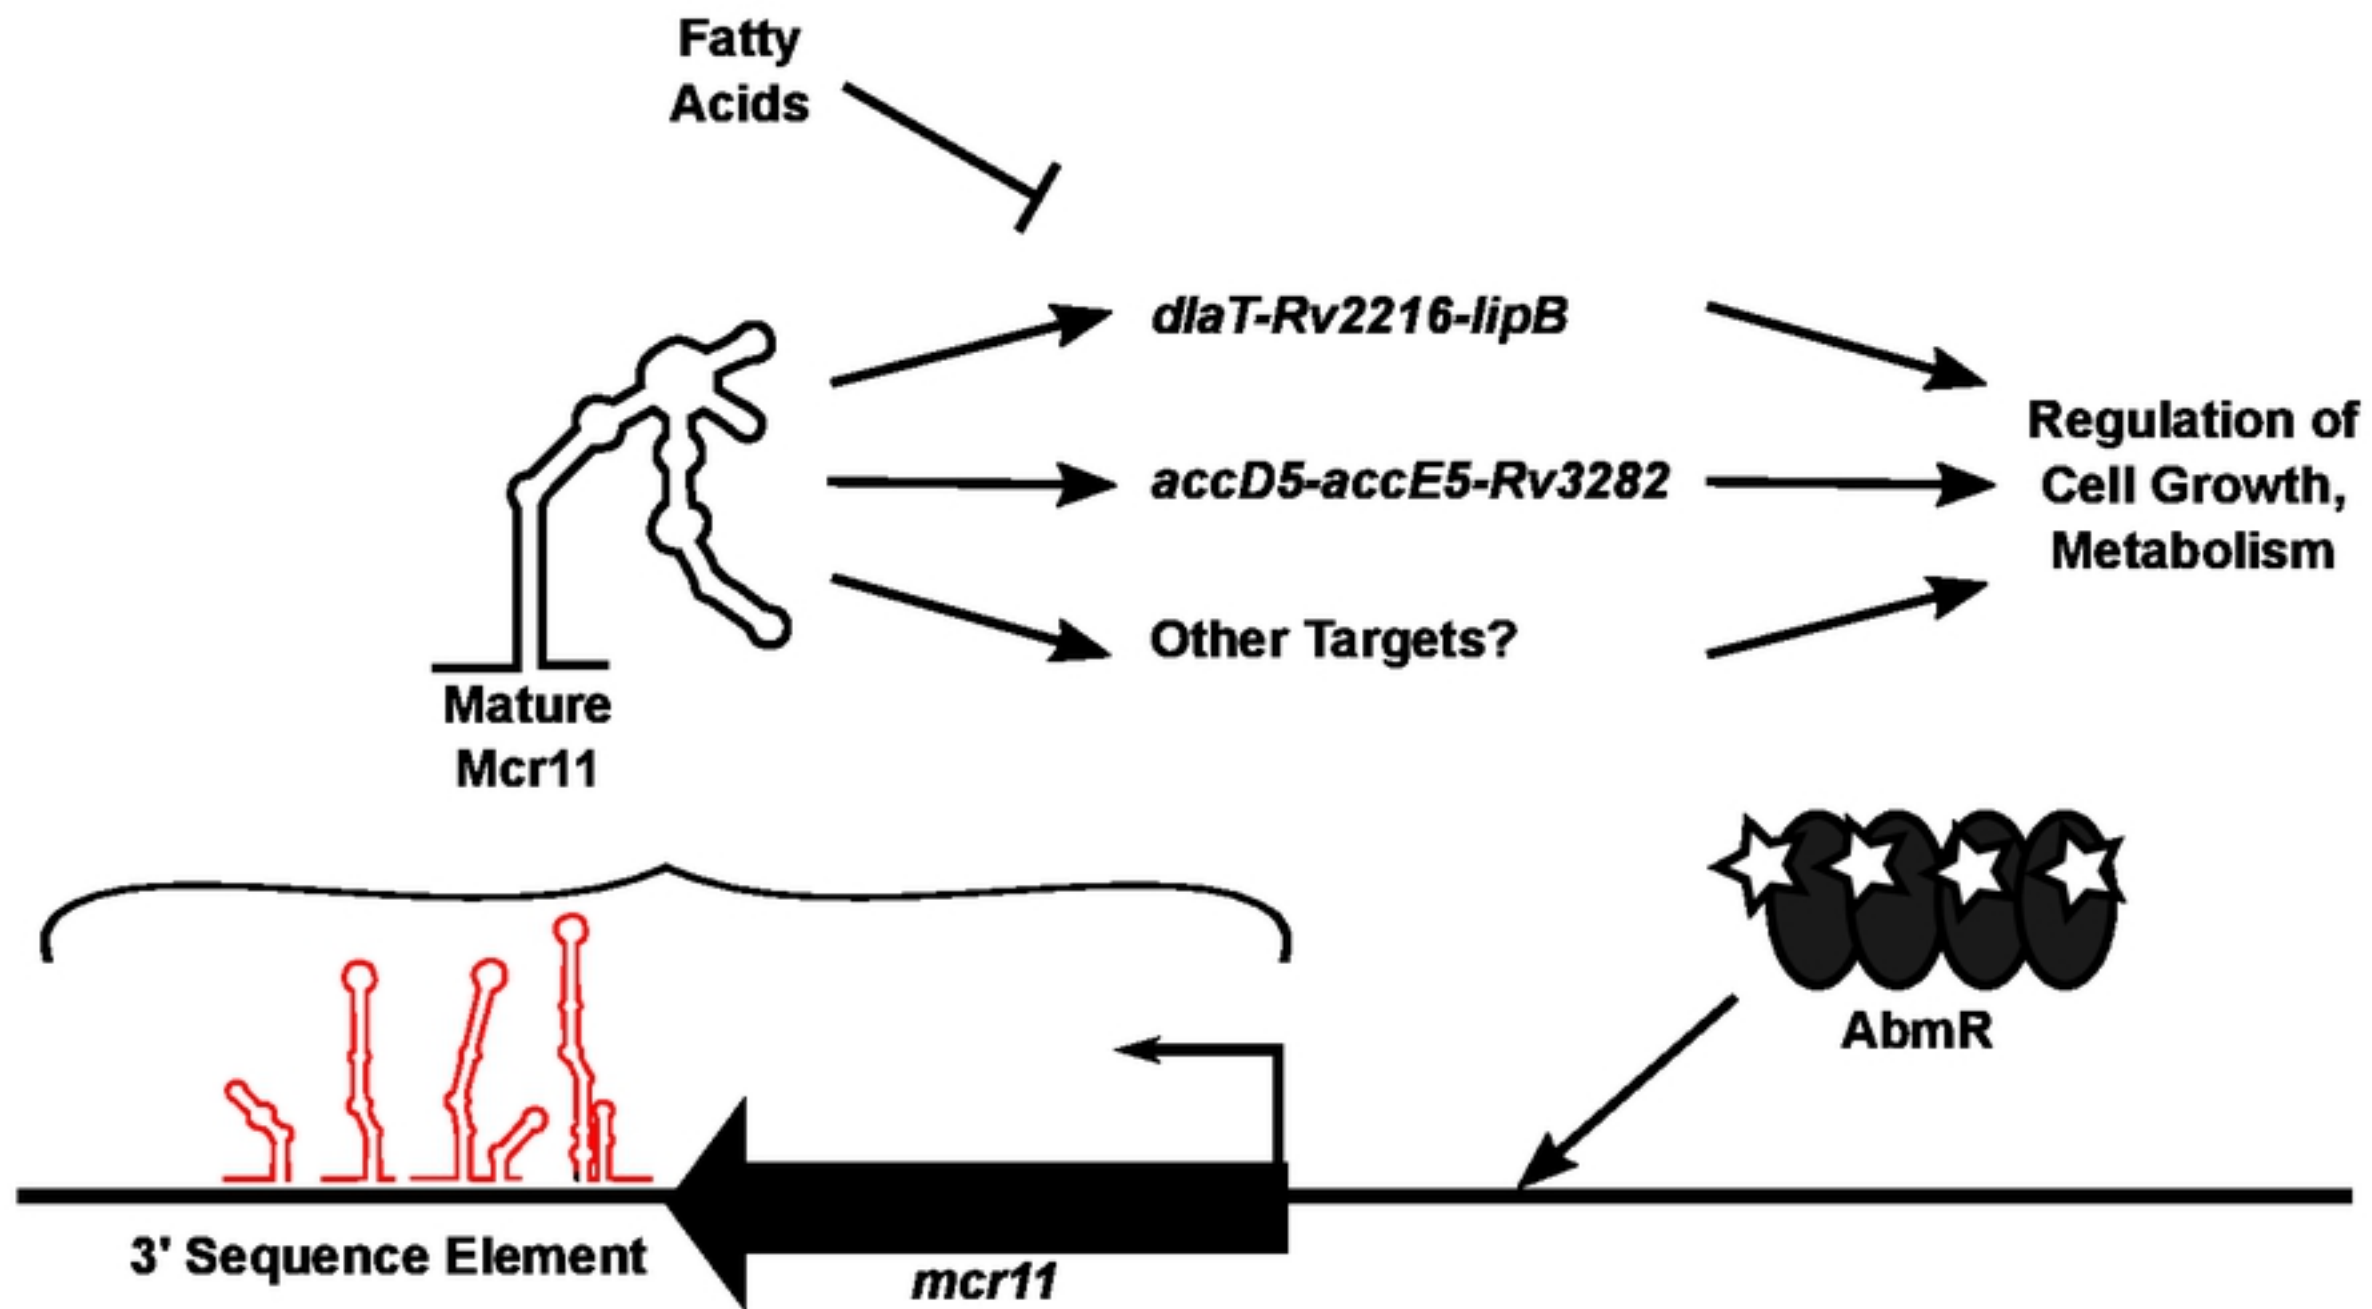

Figure 9

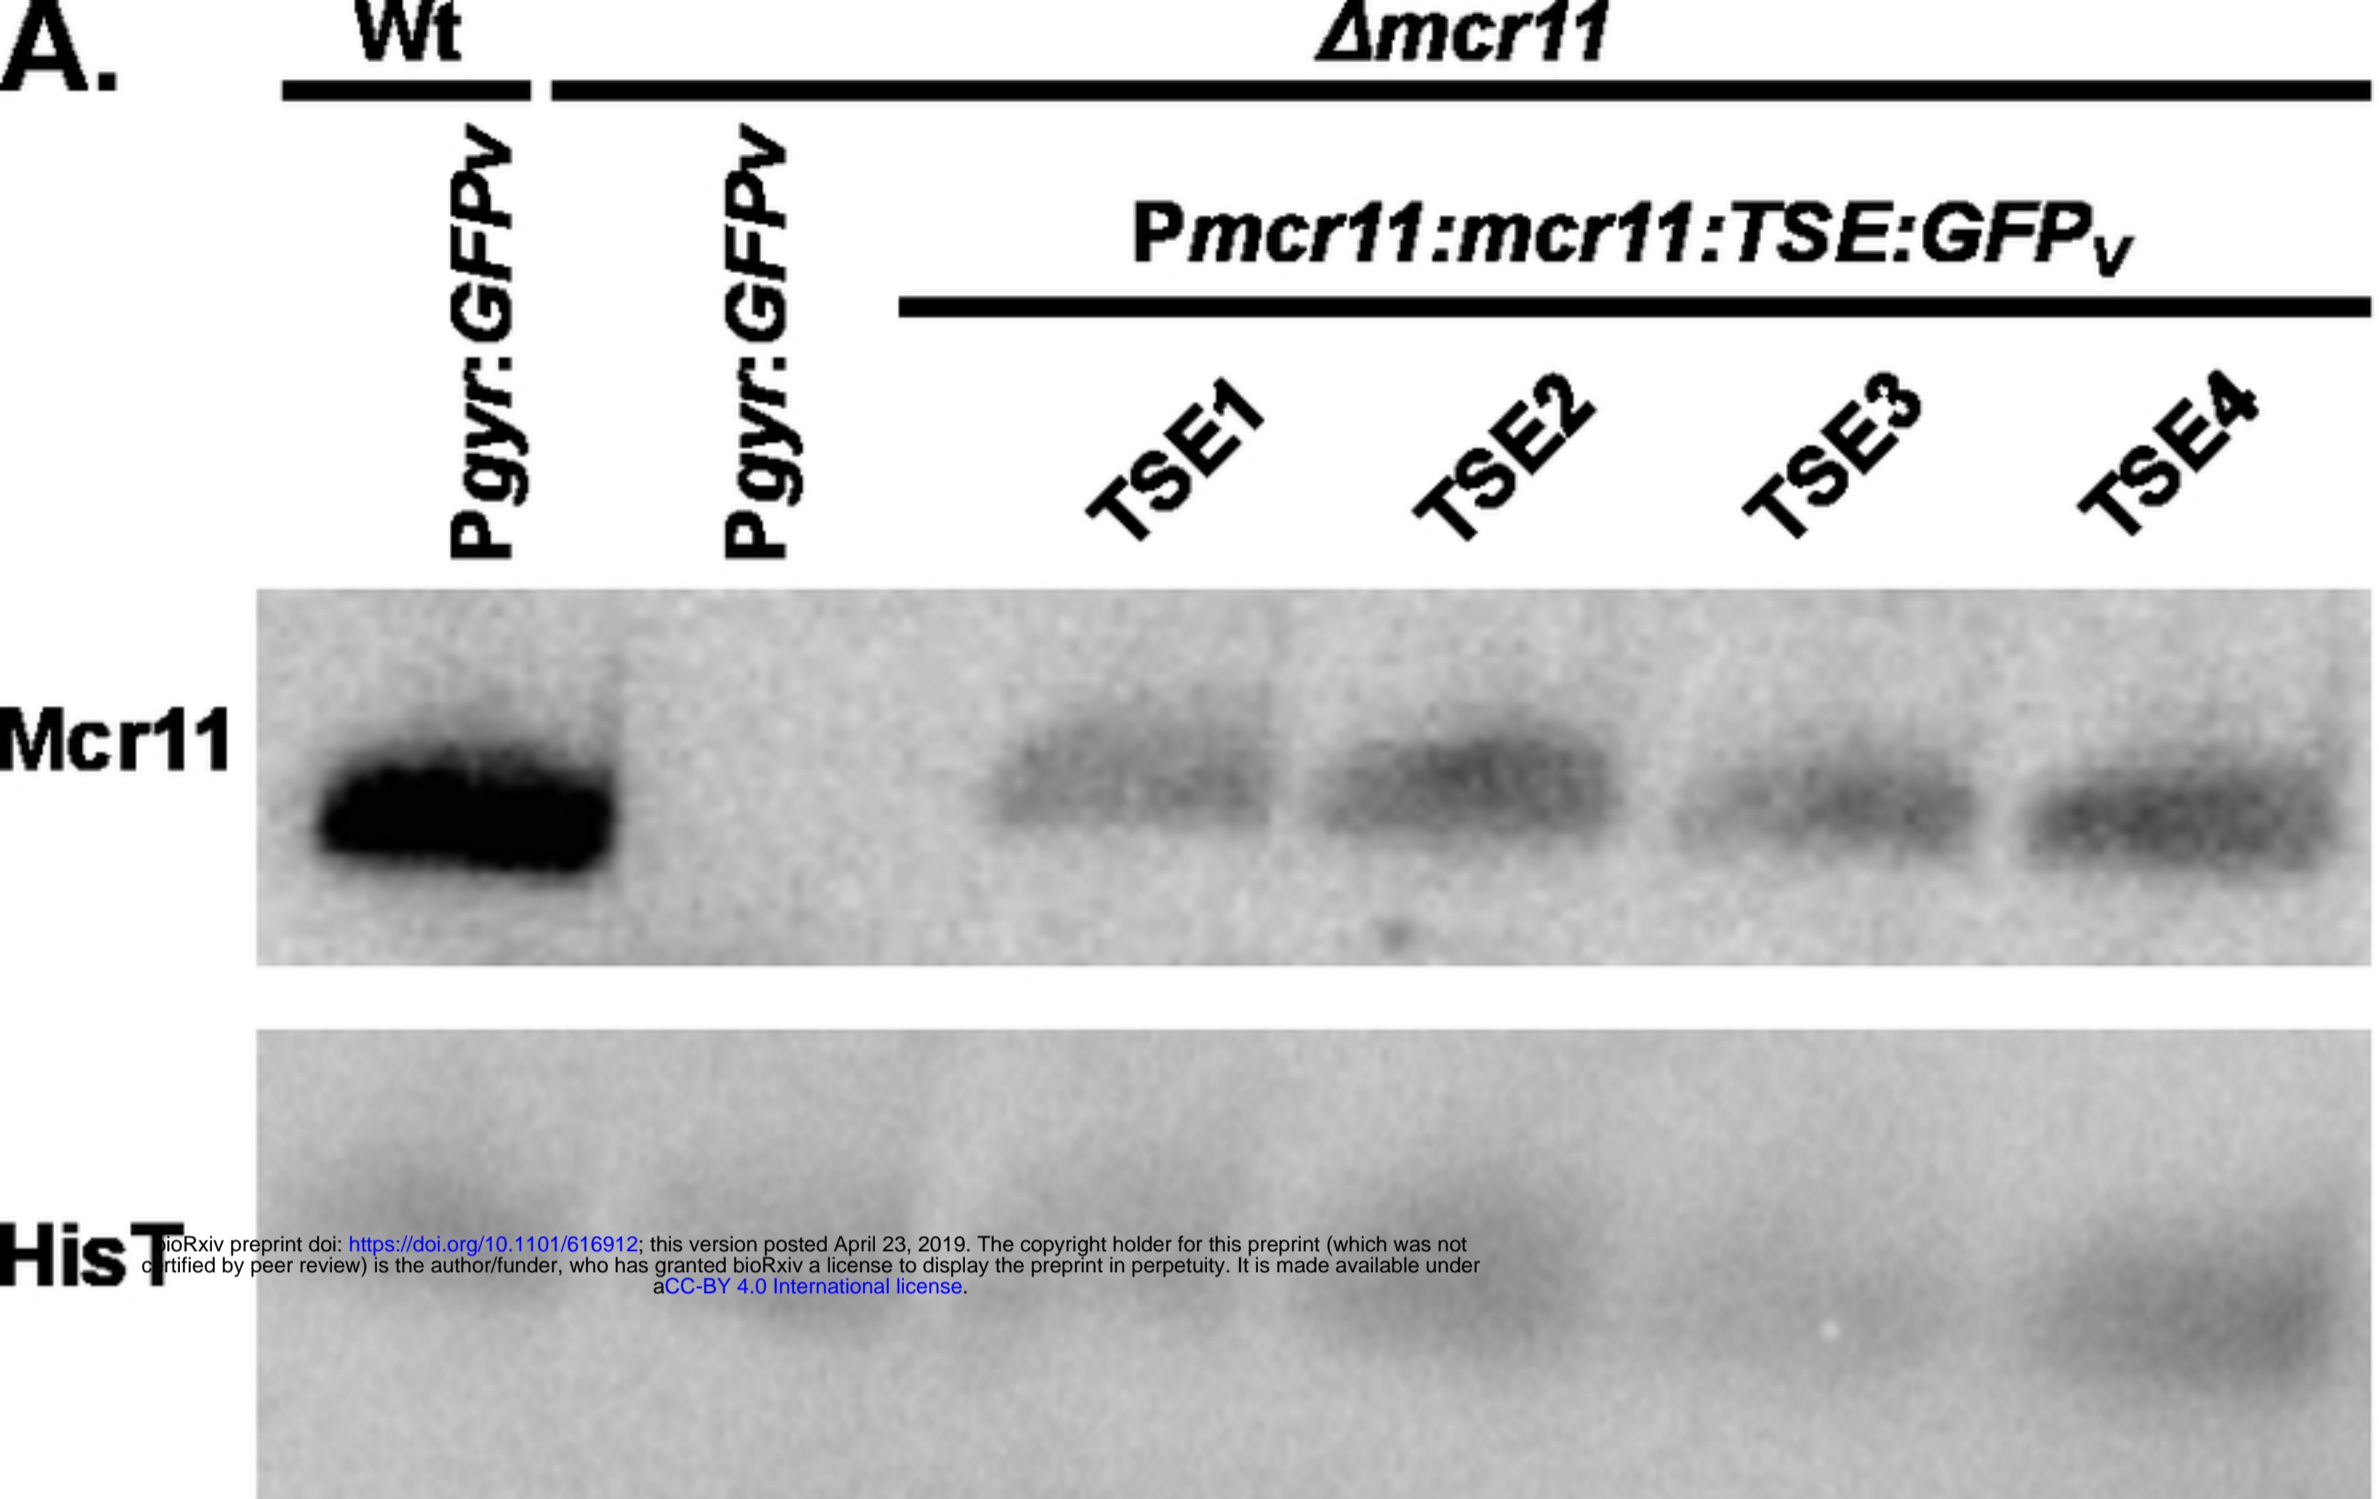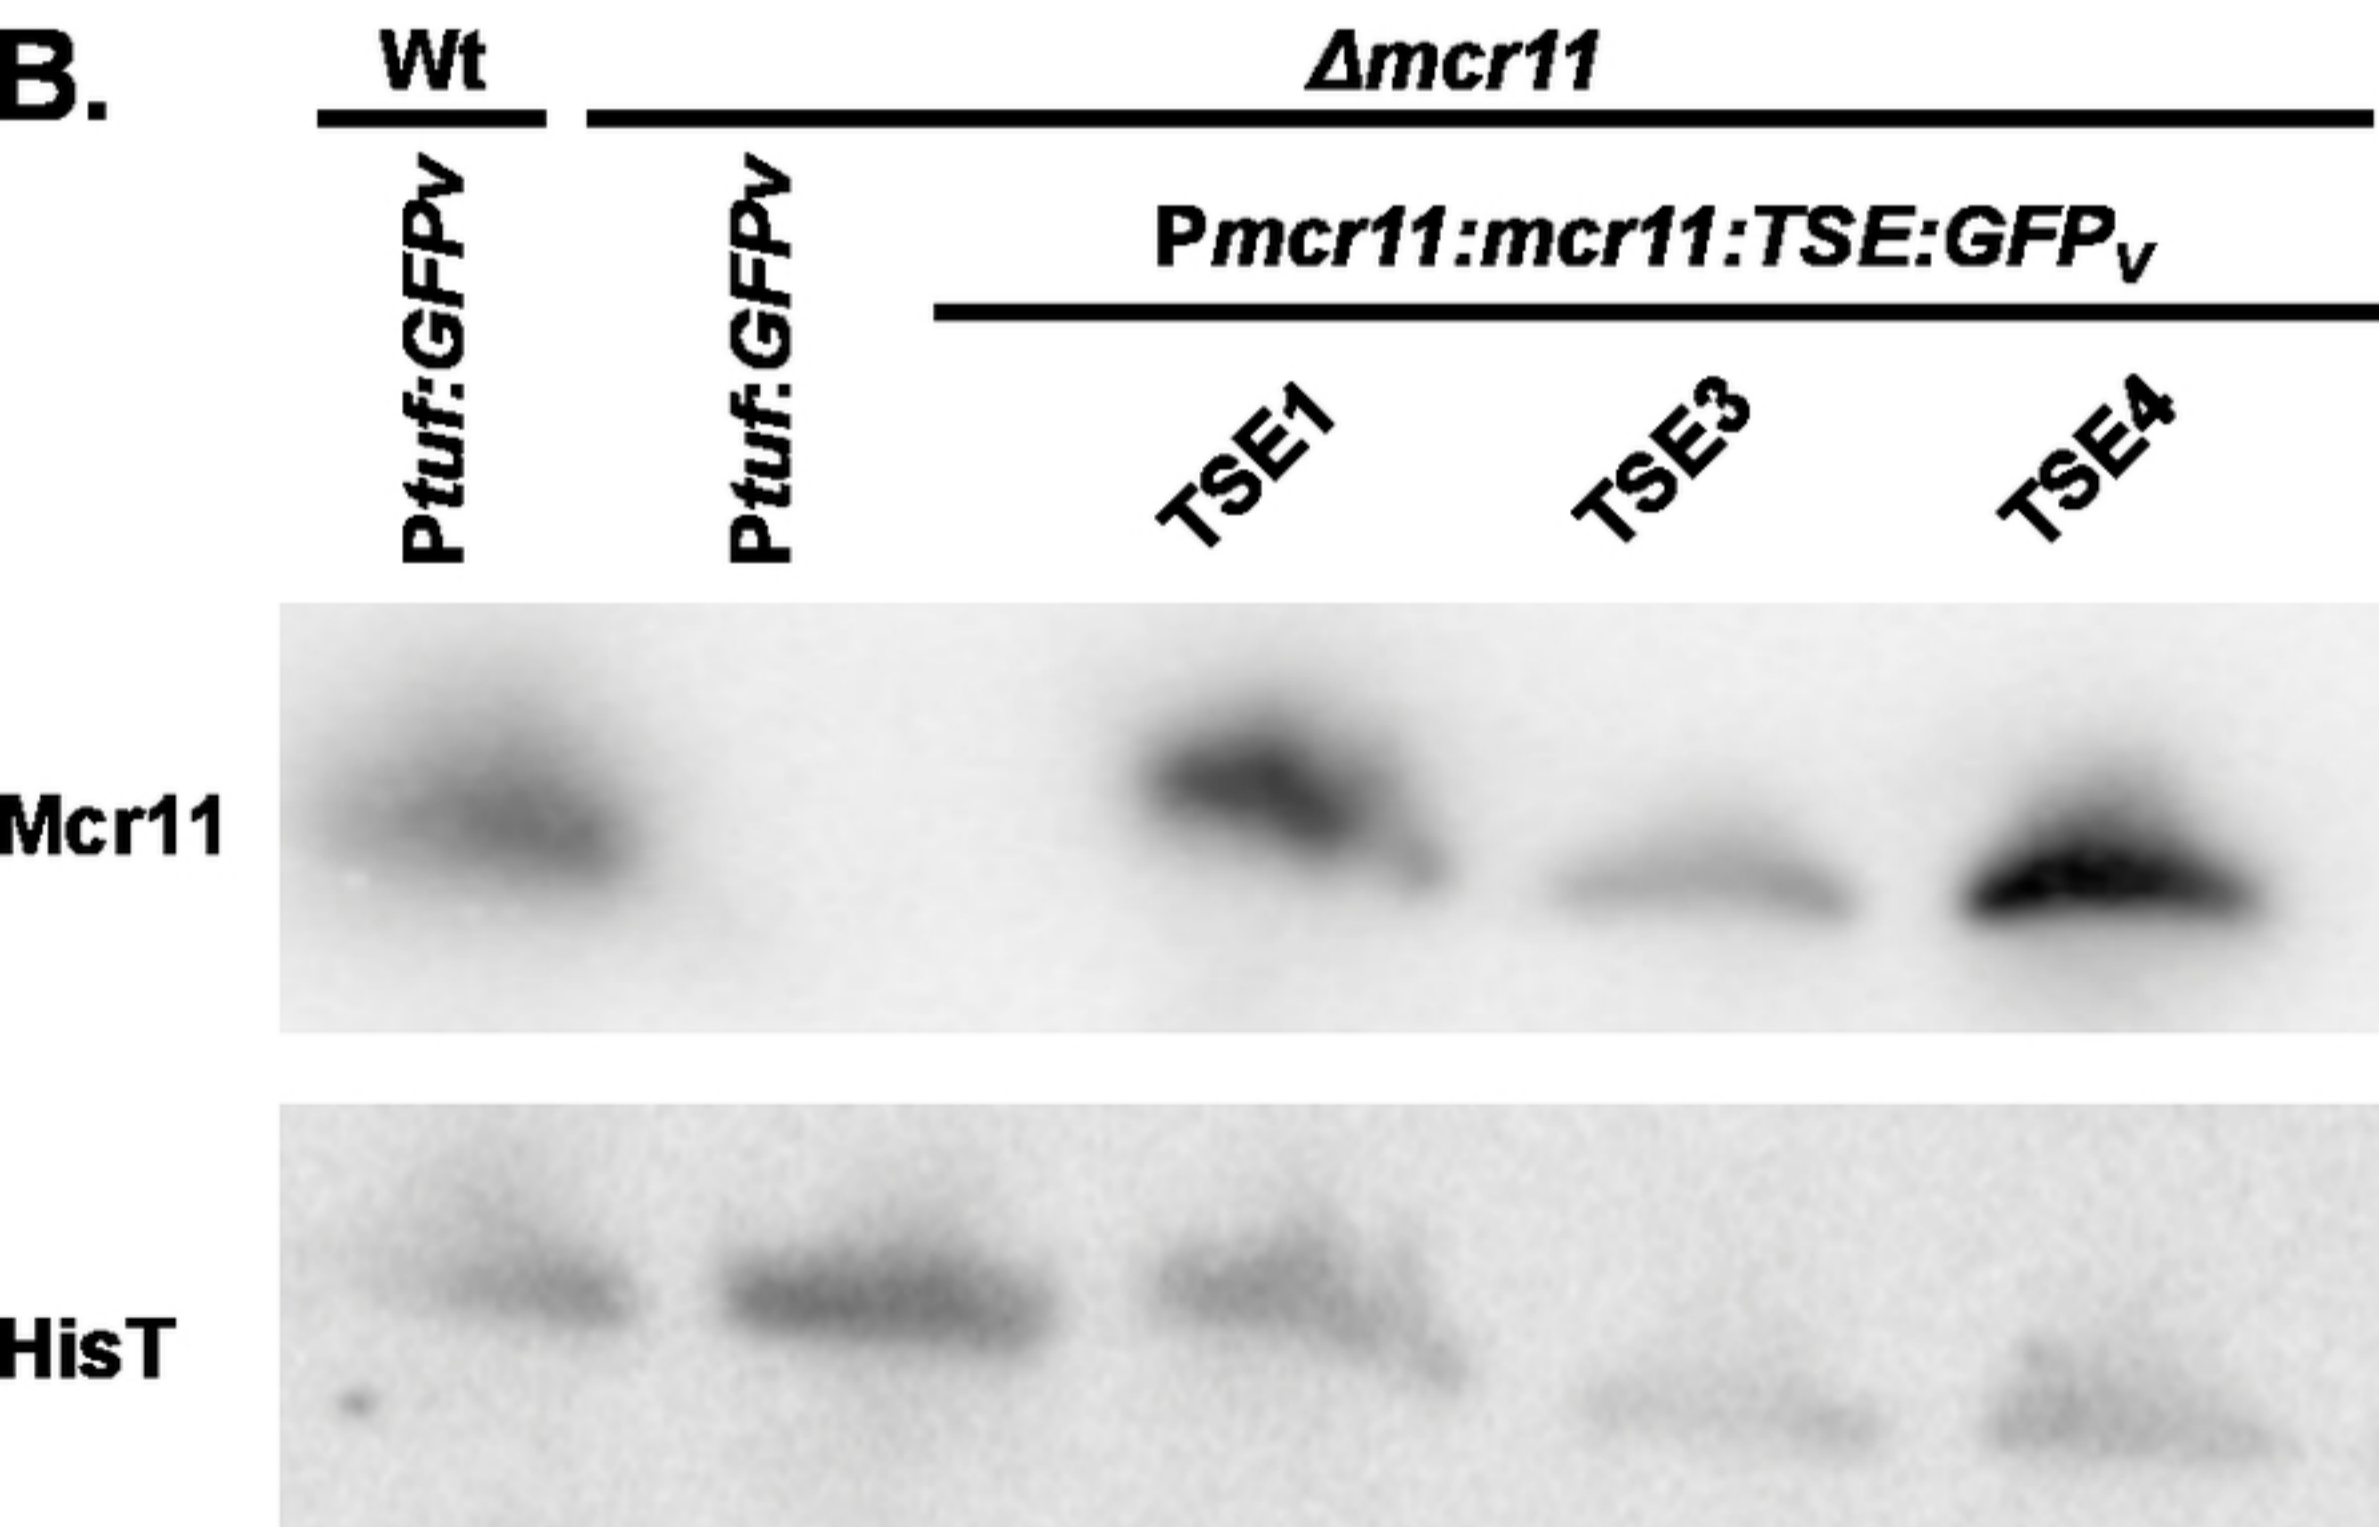

Figure 4
